# Supplementary material for: Storms mobilize organophosphate esters, bisphenols, PFASs, and vehicle-derived contaminants to San Francisco Bay watersheds
Source: Royal Society of Chemistry journal article supplement (doi:10.1039/d4em00117f), 2024-01-01
Supplement: d4em00117f2.pdf [file d4em00117f2.pdf]

*Supporting Information for:*

**Storms Mobilize Organophosphate Esters, Bisphenols, PFASs, and Vehicle-derived  
Contaminants to San Francisco Bay Watersheds**

Katherine T. Peter<sup>1,2</sup>, Alicia Gilbreath<sup>3</sup>, Melissa Gonzalez<sup>1,2</sup>, Zhenyu Tian<sup>4</sup>, Adam Wong<sup>3</sup>, Don Yee<sup>3</sup>, Ezra L. Miller<sup>3</sup>, Pedro M. Avellaneda<sup>3</sup>, Da Chen<sup>5</sup>, Andrew Patterson<sup>6</sup>, Nicole Fitzgerald<sup>7</sup>, Christopher P. Higgins<sup>7</sup>, Edward P. Kolodziej<sup>1,2,8</sup>, Rebecca Sutton<sup>3,\*</sup>

<sup>1</sup>Center for Urban Waters, Tacoma, WA 98421 USA

<sup>2</sup>Interdisciplinary Arts and Sciences, University of Washington Tacoma, Tacoma, WA 98421  
USA

<sup>3</sup>San Francisco Estuary Institute, Richmond, CA 94804 USA

<sup>4</sup>Department of Chemistry and Chemical Biology, Northeastern University, Boston, MA 02115  
USA

<sup>5</sup>School of Environment and Guangdong Key Laboratory of Environmental Pollution and Health,  
Jinan University, Guangzhou, Guangdong 510632 China

<sup>6</sup>Eurofins Environment Testing, West Sacramento, CA 95605 USA

<sup>7</sup>Department of Civil and Environmental Engineering, Colorado School of Mines, Golden, CO  
80401 USA

<sup>8</sup>Department of Civil and Environmental Engineering, University of Washington, Seattle, WA  
98195 USA

February 24, 2024

Manuscript in preparation for submission to:  
***Environmental Science: Processes & Impacts***

44 pages, 24 tables, and 7 figures

\*Corresponding author contact information  
Email: reccas@sfei.org

1 **Table of Contents**

2  
3

4 **Text S1. Chemicals and Reagents.....6**  
5 Text S1.1. Stormwater Tracer CECs.....6  
6 Text S1.2. Organophosphate Esters and Bisphenols .....6  
7 Text S1.3. PFASs (Colorado School of Mines).....6  
8 Text S1.4. PFASs (Eurofins) .....6  
9 **Table S1.** Analytical, surrogate, and internal standards – abbreviations, CAS numbers, and  
10 suppliers.....7  
11 **Text S2. Site and Storm Characteristics .....15**  
12 **Table S2.** Summary of sampling sites and land-use characteristics by San Francisco Bay  
13 watershed. References for land-use data and characteristics are provided in SI Text S2  
14 (Excel). .....15  
15 **Table S3.** Summary of sampling events and storm event characteristics for sampling in San  
16 Francisco Bay Area watersheds 2018-2022. Event 9 was a-post storm sampling event and  
17 does not include storm characteristics (Excel). .....15  
18 **Text S3. Sample Collection Information .....16**  
19 **Table S4.** Sample collection details by contaminant class .....16  
20 Text S3.1 Class-specific sample collection techniques .....16  
21 Text S3.2 Field blank sample collection.....16  
22 **Text S4. Analytical Methods .....18**  
23 Text S4.1. Stormwater Tracer CECs (UWT).....18  
24 **Table S5.** LC method settings for combined SWCEC/6PPDQ analysis and for 6PPDQ-  
25 specific analysis. ....18  
26 **Table S6.** MS/MS method settings for SWCEC analysis.....19  
27 **Table S7.** Summary of calibration ranges and internal standard (ISTD) information for  
28 targeted stormwater-derived analytes. ....19  
29 **Table S8.** Minimum, median, mean, and maximum MDLs and MQLs for SWCEC analytes  
30 across all analysis dates. Units are ng/L in the original water sample (Excel).....20  
31 Text S4.2. 6PPDQ (Eurofins) .....20  
32 **Table 9.** LC method settings for 6PPDQ analysis at Eurofins.....21  
33 **Table 10.** Mass spectrometer settings for 6PPDQ analysis at Eurofins.....21  
34 **Table 11.** Calibration standards for 6PPDQ analysis at Eurofins. \*Internal Standard used for  
35 isotope dilution quantitation. \*\*Injection Internal Standard. \*\*\*L1 is used for a sensitivity  
36 check and L2 is the low point for quantitation. ....21  
37 **Table 12.** Summary of MDL and MQL for 6PPDQ analysis at Eurofins, ng/L in the water  
38 samples. ....21  
39 Text S4.3. OPEs and Bisphenols .....22  
40 **Table S13.** LC method settings for OPE and bisphenol analysis. ....22  
41 **Table S14.** MS/MS method settings for OPE and bisphenol analysis.....23  
42 **Table S15.** Summary of MRM transitions (quantitative and qualitative, respectively) and  
43 internal standard (ISTD) information (used for isotope dilution quantitation) for OPEs and  
44 bisphenols. ....23

|    |                                                                                                                                                                         |           |
|----|-------------------------------------------------------------------------------------------------------------------------------------------------------------------------|-----------|
| 45 | <b>Table S16.</b> Minimum, median, mean, and maximum MDLs and MQLs for bisphenol and                                                                                    |           |
| 46 | OPE analytes across all analyses. Units are ng/L in the original water sample. *Denotes                                                                                 |           |
| 47 | semi-quantitative analytes (Excel). .....                                                                                                                               | 25        |
| 48 | <u>Text S4.4. PFASs, Colorado School of Mines.....</u>                                                                                                                  | <u>25</u> |
| 49 | <b>Table S17.</b> Mines laboratory list of targeted PFASs, calibration ranges, and corresponding                                                                        |           |
| 50 | internal standards. ....                                                                                                                                                | 26        |
| 51 | <b>Table S18.</b> Minimum, median, mean, and maximum MDLs and MQLs for PFASs, by                                                                                        |           |
| 52 | laboratory, across all analyses. Units are ng/L in the original water sample. *Denotes semi-                                                                            |           |
| 53 | quantitative analytes (Excel). ....                                                                                                                                     | 27        |
| 54 | <u>Text S4.5. PFASs, Eurofins West Sacramento .....</u>                                                                                                                 | <u>27</u> |
| 55 | <b>Table S19.</b> Eurofins laboratory list of targeted PFASs, calibration ranges, and corresponding                                                                     |           |
| 56 | internal standards. ....                                                                                                                                                | 28        |
| 57 | <b>Text S5. QA/QC .....</b>                                                                                                                                             | <b>30</b> |
| 58 | <u>Text S5.1. SWCECs (including 6PPDQ).....</u>                                                                                                                         | <u>30</u> |
| 59 | <u>Text S5.2. OPEs and Bisphenols .....</u>                                                                                                                             | <u>30</u> |
| 60 | <u>Text S5.3. PFASs – Mines.....</u>                                                                                                                                    | <u>31</u> |
| 61 | <u>Text S5.4. PFASs – Eurofins .....</u>                                                                                                                                | <u>32</u> |
| 62 | <b>Text S6. Quantitative Concentration Data .....</b>                                                                                                                   | <b>34</b> |
| 63 | <b>Table S20.</b> Full summary of averaged concentration data, including replicate numbers,                                                                             |           |
| 64 | variability, and QA/QC information. Sample ID is provided as SiteType_SiteID_Year,                                                                                      |           |
| 65 | where NF = near field, OB = open bay, US = urban stormwater, and Ref = reference.                                                                                       |           |
| 66 | UnitName defines the concentration unit for Result, MDL, and MQL. LabCalcType and                                                                                       |           |
| 67 | FieldCalcType indicate the calculation used to evaluate variability across lab and field                                                                                |           |
| 68 | replicates, respectively, with the corresponding values in LabCalcValue and FieldCalcValue,                                                                             |           |
| 69 | respectively. QA codes are consistent with those used by the California Environmental Data                                                                              |           |
| 70 | Exchange Network (CEDEN):                                                                                                                                               |           |
| 71 | <a href="http://ceden.org/CEDEN_Checker/Checker/DisplayCEDENLookUp.php?List=QALookUp">http://ceden.org/CEDEN_Checker/Checker/DisplayCEDENLookUp.php?List=QALookUp</a> , |           |
| 72 | with the addition of two codes: DIL (Sample diluted 10x and re-analyzed, quantitation                                                                                   |           |
| 73 | possible within calibration range) and CJ.DIL (Sample diluted 10x and re-analyzed, analyte                                                                              |           |
| 74 | still above calibration range, result considered semi-quantitative) (Excel).....                                                                                        | 34        |
| 75 | <b>Table S21.</b> Summary of averaged data for SWCECs. Units are ng/L in the original water                                                                             |           |
| 76 | sample. Note that additional details (e.g., % RPD or % RSD, number of replicates, etc.) are                                                                             |           |
| 77 | provided in Table S20 (Excel).....                                                                                                                                      | 34        |
| 78 | <b>Table S22.</b> Summaries of averaged data for bisphenols and OPEs that had detections >MDL                                                                           |           |
| 79 | (top) and of total concentration for bisphenols, total OPEs, and individual OPE classes                                                                                 |           |
| 80 | (bottom). Units are ng/L in the original water sample. *Semi-quantitative analytes. Note that                                                                           |           |
| 81 | additional details (e.g., % RPD or % RSD, number of replicates, etc.) are provided in Table                                                                             |           |
| 82 | S20 (Excel). ....                                                                                                                                                       | 34        |
| 83 | <b>Table S23.</b> Summary of averaged data for PFASs (including only PFCAs, PFSAs, and                                                                                  |           |
| 84 | diPAP analytes). Units are ng/L in the original water sample. Note that additional details                                                                              |           |
| 85 | (e.g., % RPD or % RSD, number of replicates, etc.) are provided in Table S20 (Excel). ....                                                                              | 34        |
| 86 | <b>Table S24.</b> Pairwise, non-parametric Spearman rank correlations among individual                                                                                  |           |
| 87 | contaminants. Statistical significance level set to $\alpha = 0.05$ . Correlations were only evaluated                                                                  |           |
| 88 | for analytes detected in $\geq 50\%$ of all available samples. Coloration is yellow >0.50 - 0.70,                                                                       |           |
| 89 | green >0.70-1.0 (Excel). ....                                                                                                                                           | 35        |
| 90 | <b>SI Figures.....</b>                                                                                                                                                  | <b>36</b> |

91 **Figure S1.** Bar chart summarizing all SWCEC concentrations in urban stormwater samples,  
92 grouped by compound class: (a) vehicle-derived chemicals (not including 6PPDQ), (b)  
93 BTH/BTRs, (c, e) pesticides, and (d) PPCPs. Pesticides are represented in two panels to  
94 separate (c) compounds analyzed in all samples vs. (e) in only 2 of the reference sites and 14  
95 of the urban stormwater samples. Non-detects (i.e., concentrations <MDL) are not plotted  
96 (i.e., represented as a concentration of zero) (see **Table S8** for MDL values). Sample names  
97 indicate SiteType\_SiteName\_Year, where OB = open Bay sites, NF = near field sites, Ref =  
98 reference sites, and US = urban stormwater sites. Site types are also separated by a  
99 horizontal black line. Site order from top to bottom is based on 1) the percent of impervious  
100 landcover in the watershed that corresponds to each sampling site (see **Table S2**), and 2)  
101 chronological order for repeat sampling at a given site (see **Table S3**). .....36

102 **Figure S2.** Bar chart summarizing all organophosphate ester (OPE) concentrations in urban  
103 stormwater samples, by OPE class. Non-detects (i.e., concentrations <MDL) are not plotted  
104 (i.e., represented as a concentration of zero) (see **Table S16** for MDL values). Sample  
105 names indicate SiteType\_SiteName\_Year, where Ref = reference sites and US = urban  
106 stormwater sites. Site types are also separated by a horizontal black line. Site order from top  
107 to bottom is based on 1) the percent of impervious landcover in the watershed that  
108 corresponds to each sampling site (see **Table S2**), and 2) chronological order for repeat  
109 sampling at a given site (see **Table S3**). .....38

110 **Figure S3.** Bar chart summarizing all organophosphate ester (OPE) concentrations in urban  
111 stormwater samples, by individual analyte. Non-detects (i.e., concentrations <MDL) are not  
112 plotted (i.e., represented as a concentration of zero) (see **Table S16** for MDL values).  
113 Sample names indicate SiteType\_SiteName\_Year, where Ref = reference sites and US =  
114 urban stormwater sites. Site types are also separated by a horizontal black line. Site order  
115 from top to bottom is based on 1) the percent of impervious landcover in the watershed that  
116 corresponds to each sampling site (see **Table S2**), and 2) chronological order for repeat  
117 sampling at a given site (see **Table S3**). .....39

118 **Figure S4.** Bar chart summarizing organophosphate ester (OPE) concentrations in urban  
119 stormwater samples, with each panel representing an OPE class: (a) Aryl OPEs, (b) Alkyl  
120 OPEs, (c) Chlorinated OPEs, (d) ITPs, and (e) TBPPs. Non-detects (i.e., concentrations  
121 <MDL) are not plotted (i.e., represented as a concentration of zero) (see **Table S16** for MDL  
122 values). Sample names indicate SiteType\_SiteName\_Year, where Ref = reference sites and  
123 US = urban stormwater sites. Site types are also separated by a horizontal black line. Site  
124 order from top to bottom is based on 1) the percent of impervious landcover in the  
125 watershed that corresponds to each sampling site (see **Table S2**), and 2) chronological order  
126 for repeat sampling at a given site (see **Table S3**). .....40

127 **Figure S5.** Bar chart summarizing bisphenol concentrations with detection frequency (DF)  
128 >15% in urban stormwater samples. Non-detects (i.e., concentrations <MDL) are not plotted  
129 (i.e., represented as a concentration of zero) (see **Table S16** for MDL values). Sample  
130 names indicate SiteType\_SiteName\_Year, where Ref = reference sites and US = urban  
131 stormwater sites. Site types are separated by a horizontal black line. Site order from top to  
132 bottom is based on 1) the percent of impervious landcover in the watershed that corresponds  
133 to each sampling site (see **Table S2**), and 2) chronological order for repeat sampling at a  
134 given site (see **Table S3**). .....41

135 **Figure S6.** Bar chart summarizing all PFAS concentrations in urban stormwater samples, by  
136 PFAS class. Non-detects (i.e., concentrations <MDL) are not plotted (i.e., represented as a

137 concentration of zero) (see **Table S18** for MDL values). Sample names indicate  
138 SiteType\_SiteName\_Year, where Ref = reference sites and US = urban stormwater sites.  
139 Site types are separated by a horizontal black line. Site order from top to bottom is based on  
140 1) the percent of impervious landcover in the watershed that corresponds to each sampling  
141 site (see **Table S2**), and 2) chronological order for repeat sampling at a given site (see **Table**  
142 **S3**).....42  
143 **Figure S7.** Box-and-whisker plot summarizing perfluorocarboxylic acid (PFCA) and  
144 perfluorosulfonic acid (PFSA) concentrations in urban stormwater samples, for analytes  
145 with detection frequency (DF) > 15%. Concentrations for PFDoDA are semi-quantitative.  
146 Detection frequencies are based on 26 urban stormwater samples, except for PFPrA and  
147 PFBA (n=18). Boxes indicate 25<sup>th</sup> – 75<sup>th</sup> percentile, whiskers indicate 10<sup>th</sup>-90<sup>th</sup> percentile,  
148 and a point is plotted for every sampling event, with all non-detects (i.e., concentrations  
149 <MDL) shown on the plot as ½\*MDL (see **Table S18** for MDL values). .....43  
150 **References**.....44  
151  
152

154 **Text S1. Chemicals and Reagents**

155

156 All analytical standards and suppliers are detailed in **Table S1**. Additional solvents and reagents  
157 are detailed below for each analytical method/laboratory.

158

159 Text S1.1. Stormwater Tracer CECs

160 Methanol (MeOH, LCMS grade), ethanol (absolute, 200 proof), and formic acid (HPLC grade)  
161 were obtained from Fisher Scientific (Fair Lawn, NJ, USA). A Thermo Barnstead Nanopure  
162 Diamond UV water purification system (Dubuque, IA, USA) was used to provide 18 MΩ water.  
163 Near-field and open Bay field blanks consisted of Optima™ LCMS grade water from Fisher  
164 Scientific (Hanover Park, IL).

165

166 Text S1.2. Organophosphate Esters and Bisphenols

167 HPLC-grade solvents (hexane, DCM, Optima water) were purchased from Fisher Scientific  
168 (Hanover Park, IL).

169

170 Text S1.3. PFASs (Colorado School of Mines)

171 Optima® grade methanol, Optima® grade isopropyl alcohol, 0.01% ammonium hydroxide,  
172 Optima® LC/MS grade water, LC/MS grade 2,2,2-trifluoroethanol were purchased from Fisher  
173 Scientific (Hanover Park, IL).

174

175 Text S1.4. PFASs (Eurofins)

176 Acetonitrile and Methanol, HPLC Grade, Fisher. Formic Acid, CH<sub>2</sub>O<sub>2</sub>, Fisher PN A118P-  
177 500Acetic acid, glacial, Fisher PN BP2401-500. Ammonium hydroxide (NH<sub>4</sub>OH), concentrated,  
178 reagent grade.

179

180

181

182

**Table S1.** Analytical, surrogate, and internal standards – abbreviations, CAS numbers, and suppliers.

| <b>Compound</b>                           | <b>Abbreviation</b>    | <b>CAS No.</b> | <b>Supplier</b>                                     |
|-------------------------------------------|------------------------|----------------|-----------------------------------------------------|
| <i>Stormwater Tracer CECs (SWCECs)</i>    |                        |                |                                                     |
| 6PPD-quinone (98.8% purity)               | 6PPDQ                  | 2754428-18-5   | HPC (Atlanta, GA)                                   |
| 1,3-dicyclohexylurea                      | DCU                    | 2387-23-7      | Sigma Aldrich (St. Louis, MO)                       |
| 1,3-diphenylguanidine                     | DPG                    | 102-06-7       | Sigma Aldrich (St. Louis, MO)                       |
| Hexa(methoxymethyl)melamine               | HMMM                   | 3089-11-0      | Combi-Blocks Ltd (San Diego, CA)                    |
| N-cyclohexyl-1,3-benzothiazol-2-amine     | NCBA                   | 28291-75-0     | Enamine (Monmouth Junction, NJ)                     |
| Caprolactam                               | --                     | 105-60-2       | Sigma Aldrich (St. Louis, MO)                       |
| Benzotriazole                             | BTR                    | 95-14-7        | Sigma Aldrich (St. Louis, MO)                       |
| 5-methyl-1-H-benzotriazole                | 5-methyl-1H-BTR        | 136-85-6       | Sigma Aldrich (St. Louis, MO)                       |
| 2-amino-benzothiazole                     | 2-NH <sub>2</sub> -BTH | 136-95-8       | Sigma Aldrich (St. Louis, MO)                       |
| 2-hydroxy-benzothiazole                   | 2-OH-BTH               | 934-34-9       | Sigma Aldrich (St. Louis, MO)                       |
| 2-(4-morpholinyl)benzothiazole            | 2,4-MoBT               | 4225-26-7      | Sigma Aldrich (St. Louis, MO)                       |
| Clothianidin                              | --                     | 210880-92-5    | Sigma Aldrich (St. Louis, MO)                       |
| Imidacloprid                              | --                     | 138261-41-3    | Sigma Aldrich (St. Louis, MO)                       |
| Thiamethoxam                              | --                     | 153719-23-4    | Sigma Aldrich (St. Louis, MO)                       |
| Carbendazim                               | --                     | 10605-21-7     | Sigma Aldrich (St. Louis, MO)                       |
| Diuron                                    | --                     | 330-54-1       | Sigma Aldrich (St. Louis, MO)                       |
| Iprodione                                 | --                     | 36734-19-7     | Sigma Aldrich (St. Louis, MO)                       |
| Prometon                                  | --                     | 1610-18-0      | Sigma Aldrich (St. Louis, MO)                       |
| Caffeine                                  | --                     | 58-08-2        | Sigma Aldrich (St. Louis, MO)                       |
| Cotinine                                  | --                     | 486-56-6       | Sigma Aldrich (St. Louis, MO)                       |
| Diclofenac                                | --                     | 15307-86-5     | Sigma Aldrich (St. Louis, MO)                       |
| N,N-diethyl-meta-toluamide                | DEET                   | 134-62-3       | Sigma Aldrich (St. Louis, MO)                       |
| Mecoprop                                  | --                     | 93-65-2        | Sigma Aldrich (St. Louis, MO)                       |
| Pentachlorophenol                         | PCP                    | 87-86-5        | Sigma Aldrich (St. Louis, MO)                       |
| Cetirizine                                | --                     | 83881-51-0     | Sigma Aldrich (St. Louis, MO)                       |
| Ibuprofen                                 | --                     | 15687-27-1     | Sigma Aldrich (St. Louis, MO)                       |
| Triclosan                                 | --                     | 3380-34-5      | Toronto Research Chemicals (North York, ON, Canada) |
| <i>SWCEC Internal Standards</i>           |                        |                |                                                     |
| 5-methyl-1-H-benzotriazole-d <sub>6</sub> | --                     | 1246820-65-4   | Toronto Research Chemicals (North York, ON, Canada) |
| 6PPDQ-d <sub>5</sub>                      | --                     | --             | HPC (Atlanta, GA)                                   |

|                                           |          |              |                                                     |
|-------------------------------------------|----------|--------------|-----------------------------------------------------|
| Caffeine- <sup>13</sup> C <sub>3</sub>    | --       | 78072-66-9   | Sigma Aldrich (St. Louis, MO)                       |
| Carbendazim-d <sub>4</sub>                | --       | 291765-95-2  | CDN Isotopes (Pointe-Claire, QC, Canada)            |
| Cetirizine-d <sub>8</sub>                 | --       | 2070015-04-0 | Toronto Research Chemicals (North York, ON, Canada) |
| Cotinine-d <sub>3</sub>                   | --       | 110952-70-0  | Sigma Aldrich (St. Louis, MO)                       |
| DEET-d <sub>7</sub>                       | --       | 1219799-37-7 | CDN Isotopes (Pointe-Claire, QC, Canada)            |
| Diclofenac-d <sub>4</sub>                 | --       | 153466-65-0  | Toronto Research Chemicals (North York, ON, Canada) |
| Diphenyl-d <sub>10</sub> -urea            | --       | 108009-46-7  | Toronto Research Chemicals (North York, ON, Canada) |
| Diuron-d <sub>6</sub>                     | --       | 1007536-67-5 | Toronto Research Chemicals (North York, ON, Canada) |
| Ibuprofen-d <sub>3</sub>                  | --       | 121662-14-4  | Sigma Aldrich (St. Louis, MO)                       |
| Imidacloprid-d <sub>4</sub>               | --       | 1015855-75-0 | Toronto Research Chemicals (North York, ON, Canada) |
| Prometon-d <sub>3</sub>                   | --       | 1219803-43-6 | CDN Isotopes (Pointe-Claire, QC, Canada)            |
| Triclosan-d <sub>3</sub>                  | --       | 1020719-98-5 | CDN Isotopes (Pointe-Claire, QC, Canada)            |
| <i>Aryl Organophosphate Esters (OPEs)</i> |          |              |                                                     |
| Bisphenol A bis (diphenyl phosphate)      | BPA-BDPP | 5945-33-5    | AccuStandard (New Haven, CT, USA)                   |
| 2-ethylhexyl-diphenyl phosphate           | EHDPP    | 1241-94-7    | AccuStandard (New Haven, CT, USA)                   |
| Isodecyl diphenyl phosphate               | IDDP     | 29761-21-5   | AccuStandard (New Haven, CT, USA)                   |
| Resorcinol bis (diphenyl phosphate)       | RBDPP    | 57583-54-7   | AccuStandard (New Haven, CT, USA)                   |
| Tris (3,5-dimethylphenyl) phosphate       | T35DMPP  | 25653-16-1   | Wellington Laboratories (Guelph, ON, Canada)        |
| Triphenyl phosphate                       | TPhP     | 115-86-6     | AccuStandard (New Haven, CT, USA)                   |
| Tris (2-methylphenyl) phosphate           | TMPP     | 1330-78-5    | AccuStandard (New Haven, CT, USA)                   |
| Cresyl diphenyl phosphate                 | CrDPP    | 26444-49-5   | AccuStandard (New Haven, CT, USA)                   |
| <i>Alkyl OPEs</i>                         |          |              |                                                     |
| Tris (2-butoxyethyl) phosphate            | TBOEP    | 78-51-3      | AccuStandard (New Haven, CT, USA)                   |
| Tris (2-ethylhexyl) phosphate             | TEHP     | 78-42-2      | AccuStandard (New Haven, CT, USA)                   |
| Triethyl phosphate                        | TEP      | 78-40-0      | AccuStandard (New Haven, CT, USA)                   |
| Tripropyl phosphate                       | TPrP     | 513-08-6     | AccuStandard (New Haven, CT, USA)                   |
| Triisobutyl phosphate                     | TiBP     | 126-71-6     | Wellington Laboratories (Guelph, ON, Canada)        |
| Tri-n-butyl phosphate                     | TnBP     | 126-73-8     | AccuStandard (New Haven, CT, USA)                   |
| Tris (2,3-dibromopropyl) phosphate        | TDBPP    | 126-72-7     | AccuStandard (New Haven, CT, USA)                   |
| <i>Br OPEs</i>                            |          |              |                                                     |
| Tris(tribromoneopentyl) phosphate         | TTBNPP   | 19186-97-1   | AccuStandard (New Haven, CT, USA)                   |
| <i>Cl OPEs</i>                            |          |              |                                                     |
| Tris (2-chloroethyl) phosphate            | TCEP     | 115-96-8     | AccuStandard (New Haven, CT, USA)                   |
| Tris (1-chloro-2-propyl) phosphate        | TCIPP    | 13674-84-5   | AccuStandard (New Haven, CT, USA)                   |
| Tris (1,3-dichloro-2-propyl) phosphate    | TDCIPP   | 13674-87-8   | AccuStandard (New Haven, CT, USA)                   |



|                                                        |                |              |                                              |
|--------------------------------------------------------|----------------|--------------|----------------------------------------------|
| Tetrakis (2-chloroethyl) dichloroisopentyl diphosphate | V6             | 38051-10-4   | AccuStandard (New Haven, CT, USA)            |
| <i>Isopropylated triarylphosphate esters (ITPs)</i>    |                |              |                                              |
| 2-isopropylphenyl diphenyl phosphate                   | 2iPPDPP        | 64532-94-1   | Wellington Laboratories (Guelph, ON, Canada) |
| 4-isopropylphenyl diphenyl phosphate                   | 4iPPDPP        | 55864-04-5   | Wellington Laboratories (Guelph, ON, Canada) |
| 2,4-diisopropylphenyl diphenyl phosphate               | 24DiPPDPP      | 96107-55-0   | Wellington Laboratories (Guelph, ON, Canada) |
| bis(2-isopropylphenyl) phenyl phosphate                | B2iPPP         | 69500-29-4   | Wellington Laboratories (Guelph, ON, Canada) |
| bis(3-isopropylphenyl) phenyl phosphate                | B3iPPP         | 69500-30-7   | Wellington Laboratories (Guelph, ON, Canada) |
| bis(4-isopropylphenyl) phenyl phosphate                | B4iPPP         | 55864-07-8   | Wellington Laboratories (Guelph, ON, Canada) |
| bis(2,4-diisopropylphenyl) phenyl phosphate            | B24DiPPP       | 2190501-29-0 | Wellington Laboratories (Guelph, ON, Canada) |
| tris(2-isopropylphenyl) phosphate                      | T2iPPP         | 64532-95-2   | AccuStandard (New Haven, CT, USA)            |
| tris(3-isopropylphenyl) phosphate                      | T3iPPP         | 72668-27-0   | Wellington Laboratories (Guelph, ON, Canada) |
| tris(4-isopropylphenyl) phosphate                      | T4iPPP         | 2502-15-0    | Wellington Laboratories (Guelph, ON, Canada) |
| <i>Tert-butylated Triarylphosphate Esters (TBPPs)</i>  |                |              |                                              |
| 2-tert-butylphenyl diphenyl phosphate                  | 2tBPDPP        | 83242-23-3   | Wellington Laboratories (Guelph, ON, Canada) |
| 4-tert-butylphenyl diphenyl phosphate                  | 4tBPDPP        | 981-40-8     | Wellington Laboratories (Guelph, ON, Canada) |
| bis(2-tert-butylphenyl) phenyl phosphate               | B2tBPPP        | 65652-41-7   | Wellington Laboratories (Guelph, ON, Canada) |
| bis(4-tert-butylphenyl) phenyl phosphate               | B4tBPPP        | 115-87-7     | Wellington Laboratories (Guelph, ON, Canada) |
| tris(4-tert-butylphenyl) phosphate                     | T4tBPP         | 78-33-1      | Wellington Laboratories (Guelph, ON, Canada) |
| <i>Bisphenols</i>                                      |                |              |                                              |
| Bisphenol A                                            | BPA            | 80-05-7      | AccuStandard (New Haven, CT, USA)            |
| Bisphenol AF                                           | BPAF           | 1478-61-1    | AccuStandard (New Haven, CT, USA)            |
| Bisphenol AP                                           | BPAP           | 1571-75-1    | AccuStandard (New Haven, CT, USA)            |
| Bisphenol B                                            | BPB            | 77-40-7      | AccuStandard (New Haven, CT, USA)            |
| Bisphenol BP                                           | BPBP           | 1844-01-5    | AccuStandard (New Haven, CT, USA)            |
| Bisphenol C                                            | BPC            | 79-97-0      | AccuStandard (New Haven, CT, USA)            |
| Bisphenol C-dichloride                                 | BPC-dichloride | 14868-03-2   | AccuStandard (New Haven, CT, USA)            |
| Bisphenol E                                            | BPE            | 2081-08-5    | AccuStandard (New Haven, CT, USA)            |
| Bisphenol F                                            | BPF            | 620-92-8     | AccuStandard (New Haven, CT, USA)            |
| Bisphenol G                                            | BPG            | 127-54-8     | AccuStandard (New Haven, CT, USA)            |
| Bisphenol M                                            | BPM            | 13595-25-0   | AccuStandard (New Haven, CT, USA)            |
| Bisphenol P                                            | BPP            | 2167-51-3    | AccuStandard (New Haven, CT, USA)            |
| Bisphenol PH                                           | BPPH           | 24038-68-4   | AccuStandard (New Haven, CT, USA)            |
| Bisphenol S                                            | BPS            | 80-09-1      | AccuStandard (New Haven, CT, USA)            |
| Bisphenol TMC                                          | BP-TMC         | 129188-99-4  | AccuStandard (New Haven, CT, USA)            |

|                                                                                    |                                     |              |                                                     |
|------------------------------------------------------------------------------------|-------------------------------------|--------------|-----------------------------------------------------|
| Bisphenol Z                                                                        | BPZ                                 | 843-55-0     | AccuStandard (New Haven, CT, USA)                   |
| Bisphenol A diglycidyl ether                                                       | BADGE                               | 1675-54-3    | AccuStandard (New Haven, CT, USA)                   |
| <i>OPE &amp; Bisphenol Injection Internal Standards** &amp; Internal Standards</i> |                                     |              |                                                     |
| <sup>13</sup> C <sub>18</sub> -Triphenyl phosphate**                               | <sup>13</sup> C <sub>18</sub> -TPhP | --           | Wellington Laboratories (Guelph, ON, Canada)        |
| Tris(1,3-dichloro-2-propyl) phosphate-d <sub>15</sub>                              | d <sub>15</sub> -TDCIPP             | 1447569-77-8 | Wellington Laboratories (Guelph, ON, Canada)        |
| Tris(2-chloroethyl) phosphate-d <sub>12</sub>                                      | d <sub>12</sub> -TCEP               | 1276500-47-0 | Wellington Laboratories (Guelph, ON, Canada)        |
| Triphenyl phosphate-d <sub>15</sub>                                                | d <sub>15</sub> -TPhP               | 1173020-30-8 | Wellington Laboratories (Guelph, ON, Canada)        |
| Tris (2-butoxy-[ <sup>13</sup> C <sub>2</sub> ]-ethyl) phosphate                   | M <sub>6</sub> -TBOEP               | --           | Wellington Laboratories (Guelph, ON, Canada)        |
| Tri-n-butyl phosphate-d <sub>27</sub>                                              | d <sub>27</sub> -TnBP               | 61196-26-7   | Wellington Laboratories (Guelph, ON, Canada)        |
| Triethyl phosphate-d <sub>15</sub>                                                 | d <sub>15</sub> -TEP                | 135942-11-9  | Wellington Laboratories (Guelph, ON, Canada)        |
| Bisphenol A-d <sub>16</sub> **                                                     | d <sub>16</sub> -BPA                | 96210-87-6   | Sigma Aldrich (St. Louis, MO)                       |
| Bisphenol A-d <sub>6</sub>                                                         | d <sub>6</sub> -BPA                 | 86588-58-1   | Sigma Aldrich (St. Louis, MO)                       |
| Bisphenol S-d <sub>8</sub>                                                         | d <sub>8</sub> -BPS                 | 2483831-28-1 | Toronto Research Chemicals (North York, ON, Canada) |
| <i>PFASs – PFCAs</i>                                                               |                                     |              |                                                     |
| Perfluoro-n-butanoic acid                                                          | PFBA                                | 375-22-4     | Wellington Laboratories (Guelph, ON, Canada)        |
| Perfluoro-n-pentanoic acid                                                         | PFPeA                               | 2706-90-3    | Wellington Laboratories (Guelph, ON, Canada)        |
| Pentafluoropropionic acid                                                          | PFPrA                               | 422-64-0     | Wellington Laboratories (Guelph, ON, Canada)        |
| Perfluoro-n-hexanoic acid                                                          | PFHxA                               | 307-24-4     | Wellington Laboratories (Guelph, ON, Canada)        |
| Perfluoro-n-heptanoic acid                                                         | PFHpA                               | 375-85-9     | Wellington Laboratories (Guelph, ON, Canada)        |
| Perfluoro-n-octanoic acid                                                          | PFOA                                | 335-67-1     | Wellington Laboratories (Guelph, ON, Canada)        |
| Perfluoro-n-nonanoic acid                                                          | PFNA                                | 375-95-1     | Wellington Laboratories (Guelph, ON, Canada)        |
| Perfluoro-n-decanoic acid                                                          | PFDA                                | 335-76-2     | Wellington Laboratories (Guelph, ON, Canada)        |
| Perfluoroundecanoic acid                                                           | PFUnDA                              | 2058-94-8    | Wellington Laboratories (Guelph, ON, Canada)        |
| Perfluoro-n-dodecanoic acid                                                        | PFDoDA                              | 307-55-1     | Wellington Laboratories (Guelph, ON, Canada)        |
| Perfluorotridecanoic acid                                                          | PFTrDA                              | 72629-94-8   | Wellington Laboratories (Guelph, ON, Canada)        |
| Perfluoro-n-tetradecanoic acid                                                     | PFTeDA                              | 376-06-7     | Wellington Laboratories (Guelph, ON, Canada)        |
| Perfluoro-n-hexadecanoic acid                                                      | PFHxDA                              | 67905-19-5   | Wellington Laboratories (Guelph, ON, Canada)        |
| <i>PFASs – PFSAs</i>                                                               |                                     |              |                                                     |
| Perfluoropropane sulfonate                                                         | PFPrS                               | 423-41-6     | Wellington Laboratories (Guelph, ON, Canada)        |
| Perfluorobutane sulfonate                                                          | PFBS                                | 375-73-5     | Wellington Laboratories (Guelph, ON, Canada)        |
| Perfluoropentane sulfonate                                                         | PFPeS                               | 2706-91-4    | Wellington Laboratories (Guelph, ON, Canada)        |
| Perfluorohexane sulfonate                                                          | PFHxS                               | 355-46-4     | Wellington Laboratories (Guelph, ON, Canada)        |
| Perfluoroheptane sulfonate                                                         | PFHpS                               | 375-92-8     | Wellington Laboratories (Guelph, ON, Canada)        |
| Perfluorooctane sulfonate                                                          | PFOS                                | 1763-23-1    | Wellington Laboratories (Guelph, ON, Canada)        |
| Perfluorononane sulfonate                                                          | PFNS                                | 68259-12-1   | Wellington Laboratories (Guelph, ON, Canada)        |

|                                                      |             |              |                                              |
|------------------------------------------------------|-------------|--------------|----------------------------------------------|
| Perfluorodecane sulfonate                            | PFDS        | 335-77-3     | Wellington Laboratories (Guelph, ON, Canada) |
| Perfluorododecane sulfonate                          | PFDoDS      | 79780-39-5   | Wellington Laboratories (Guelph, ON, Canada) |
| <i>PFASs – FOSA/FOSAA/FOSE</i>                       |             |              |                                              |
| N-methylperfluoro-1-octane sulfonamide               | NMeFOSA     | 4151-50-2    | Wellington Laboratories (Guelph, ON, Canada) |
| N-ethylperfluoro-1-octane sulfonamide                | NEtFOSA     | 31506-32-8   | Wellington Laboratories (Guelph, ON, Canada) |
| Perfluorooctane sulfonamido acetic acid              | FOSAA       | 2806-24-8    | Wellington Laboratories (Guelph, ON, Canada) |
| N-methylperfluorooctane sulfonamido acetic acid      | NMeFOSAA    | 2355-31-9    | Wellington Laboratories (Guelph, ON, Canada) |
| N-ethylperfluorooctane sulfonamido acetic acid       | NEtFOSAA    | 2991-50-6    | Wellington Laboratories (Guelph, ON, Canada) |
| N-Methylperfluorooctanesulfonamidoethanol            | NMeFOSE     | 24448-09-7   | Wellington Laboratories (Guelph, ON, Canada) |
| N-Ethyl-N-(2-hydroxyethyl)perfluorooctylsulphonamide | NEtFOSE     | 1691-99-2    | Wellington Laboratories (Guelph, ON, Canada) |
| Perfluorooctane sulfonamide                          | PFOSA       | 754-91-6     | Wellington Laboratories (Guelph, ON, Canada) |
| <i>Cl-PFASs</i>                                      |             |              |                                              |
| 8-chloro-perfluorooctane sulfonate                   | 8Cl-PFOS    | 1651215-26-7 | Wellington Laboratories (Guelph, ON, Canada) |
| 9-chloro-3-oxa-perfluorononane sulfonate             | F-53B Major | 756426-58-1  | Wellington Laboratories (Guelph, ON, Canada) |
| 11-chloro-3-oxa-perfluoroundecane sulfonate          | F-53B Minor | 763051-92-9  | Wellington Laboratories (Guelph, ON, Canada) |
| <i>PFASs – FTS</i>                                   |             |              |                                              |
| 4:2 fluorotelomer sulfonate                          | 4:2 FTS     | 757124-72-4  | Wellington Laboratories (Guelph, ON, Canada) |
| 6:2 fluorotelomer sulfonate                          | 6:2 FTS     | 27619-97-2   | Wellington Laboratories (Guelph, ON, Canada) |
| 8:2 fluorotelomer sulfonate                          | 8:2 FTS     | 39108-34-4   | Wellington Laboratories (Guelph, ON, Canada) |
| 10:2 fluorotelomer sulfonate                         | 10:2 FTS    | 120226-60-0  | Wellington Laboratories (Guelph, ON, Canada) |
| <i>PFASs – FTCA/FTUCA</i>                            |             |              |                                              |
| 3:3 fluorotelomer carboxylic acid                    | 3:3 FTCA    | 356-02-5     | Wellington Laboratories (Guelph, ON, Canada) |
| 5:3 fluorotelomer carboxylic acid                    | 5:3 FTCA    | 914637-49-3  | Wellington Laboratories (Guelph, ON, Canada) |
| 7:3 fluorotelomer carboxylic acid                    | 7:3 FTCA    | 812-70-4     | Wellington Laboratories (Guelph, ON, Canada) |
| 6:2 fluorotelomer carboxylic acid                    | 6:2 FTCA    | 53826-12-3   | Wellington Laboratories (Guelph, ON, Canada) |
| 8:2 fluorotelomer carboxylic acid                    | 8:2 FTCA    | 27854-31-5   | Wellington Laboratories (Guelph, ON, Canada) |
| 10:2 fluorotelomer carboxylic acid                   | 10:2 FTCA   | 53826-13-4   | Wellington Laboratories (Guelph, ON, Canada) |
| 2H-Perfluoro-2-octenoic acid (6:2)                   | 6:2 FTUCA   | 70887-88-6   | Wellington Laboratories (Guelph, ON, Canada) |
| 2H-Perfluoro-2-decenoic acid (8:2)                   | 8:2 FTUCA   | 70887-84-2   | Wellington Laboratories (Guelph, ON, Canada) |
| 2H-Perfluoro-2-dodecenoic acid (10:2)                | 10:2 FTUCA  | 70887-94-4   | Wellington Laboratories (Guelph, ON, Canada) |
| <i>PFASs – PFECA</i>                                 |             |              |                                              |
| Perfluoro-n-octadecanoic acid                        | PFODA       | 16517-11-6   | Wellington Laboratories (Guelph, ON, Canada) |

|                                                                                                            |                     |              |                                              |
|------------------------------------------------------------------------------------------------------------|---------------------|--------------|----------------------------------------------|
| Dodecafluoro-3H-4,8-dioxanonanoate                                                                         | ADONA               | 919005-14-4  | Wellington Laboratories (Guelph, ON, Canada) |
| Tetrafluoro-2-(heptafluoropropoxy)propanoic acid                                                           | HFPO-DA             | 13252-13-6   | Wellington Laboratories (Guelph, ON, Canada) |
| 2,2,3,3-Tetrafluoro-3-{{1,1,1,2,3,3-hexafluoro-3-(1,2,2,2-tetrafluoroethoxy)propan-2-yl}oxy}propanoic acid | Hydro-EVE Acid      | 773804-62-9  | Wellington Laboratories (Guelph, ON, Canada) |
| Tetrafluoro-3-(trifluoro-1-(trifluoromethyl)-2-((trifluorovinyl)oxy)ethoxy) propionic acid                 | EVE Acid            | 69087-46-3   | Wellington Laboratories (Guelph, ON, Canada) |
| 2,3,3,3-Tetrafluoro-2-(pentafluoroethoxy)propanoic acid                                                    | PEPA                | 267239-61-2  | Wellington Laboratories (Guelph, ON, Canada) |
| 3-(Methoxy)tetrafluoropropionic acid                                                                       | MTP                 | 93449-21-9   | Wellington Laboratories (Guelph, ON, Canada) |
| Perfluoro-3,6-dioxaheptanoic acid                                                                          | PFECA B             | 151772-58-6  | Wellington Laboratories (Guelph, ON, Canada) |
| Perfluoro(4-methoxybutanoic) acid                                                                          | PFECA A             | 863090-89-5  | Wellington Laboratories (Guelph, ON, Canada) |
| Perfluoro-3-methoxypropanoic acid                                                                          | PFECA F             | 377-73-1     | Wellington Laboratories (Guelph, ON, Canada) |
| Perfluoro-2-methoxyacetic acid                                                                             | PFMOAA              | 674-13-5     | Wellington Laboratories (Guelph, ON, Canada) |
| Perfluoro-3,5-dioxahexanoic acid                                                                           | PFO2HxA             | 39492-88-1   | Wellington Laboratories (Guelph, ON, Canada) |
| Perfluoro-3,5,7-trioxaoctanoic acid                                                                        | PFO3OA              | 39492-89-2   | Wellington Laboratories (Guelph, ON, Canada) |
| Perfluoro-3,5,7,9-butaoxidecanoic acid                                                                     | PFO4DA              | 39492-90-5   | Wellington Laboratories (Guelph, ON, Canada) |
| Perfluoro-3,5,7,9,11-pentaoxidodecanoic acid                                                               | PFO5DA              | 39492-91-6   | Wellington Laboratories (Guelph, ON, Canada) |
| 2,3,3,3-Tetrafluoro-2-(trifluoromethoxy)propanoic acid                                                     | PMPA                | 13140-29-9   | Wellington Laboratories (Guelph, ON, Canada) |
| 4-(2-Carboxy-1,1,2,2-tetrafluoroethoxy)-perfluoropentanoic acid                                            | R-EVE               | 2416366-22-6 | Wellington Laboratories (Guelph, ON, Canada) |
| Perfluoro-4-isopropoxybutanoic acid                                                                        | PFPE-1 (or PFECA G) | 801212-59-9  | Wellington Laboratories (Guelph, ON, Canada) |
| <i>PFASs – PFESA</i>                                                                                       |                     |              |                                              |
| 7H-Perfluoro-4-methyl-3,6-dioxaoctanesulfonic acid                                                         | Hydro-PS Acid       | 749836-20-2  | Wellington Laboratories (Guelph, ON, Canada) |
| Nafion Byproduct 5                                                                                         | Hydrolyzed PSDA     | 2416366-19-1 | Wellington Laboratories (Guelph, ON, Canada) |
| Sodium 1,1,2,2-Tetrafluoro-2-(1,2,2,2-tetrafluoroethoxy)ethane-1-sulfonate                                 | NVHOS               | 1132933-86-8 | Wellington Laboratories (Guelph, ON, Canada) |
| Perfluoro(2-ethoxyethane)sulphonic acid                                                                    | PES                 | 113507-82-7  | Wellington Laboratories (Guelph, ON, Canada) |
| Cyclohexanesulfonic acid, 1,2,2,3,3,4,5,5,6,6-decafluoro-4-(1,1,2,2,2-pentafluoroethyl)                    | PFECHS              | 133201-07-7  | Wellington Laboratories (Guelph, ON, Canada) |
| 1-(Trifluorovinyl)oxy-2-(2-                                                                                | PS Acid             | 29311-67-9   | Wellington Laboratories (Guelph, ON, Canada) |

|                                           |                                         |              |                                              |
|-------------------------------------------|-----------------------------------------|--------------|----------------------------------------------|
| sulfotetrafluoroethoxy)hexafluoropropane  |                                         |              |                                              |
| Perfluoro-4-(2-sulfoethoxy)pentanoic acid | R-PSDA                                  | 2416366-18-0 | Wellington Laboratories (Guelph, ON, Canada) |
| Nafion Byproduct 6                        | R-PSDCA                                 | 2416366-21-5 | Wellington Laboratories (Guelph, ON, Canada) |
| <i>PFASs – diPAPs</i>                     |                                         |              |                                              |
| 6:2 Fluorotelomer phosphate diester       | 6:2-diPAP                               | 57677-95-9   | Wellington Laboratories (Guelph, ON, Canada) |
| 8:2 Fluorotelomer phosphate diester       | 8:2-diPAP                               | 678-41-1     | Wellington Laboratories (Guelph, ON, Canada) |
| 10:2 Fluorotelomer phosphate diester      | 10:2-diPAP                              | 1895-26-7    | Wellington Laboratories (Guelph, ON, Canada) |
| 6:2/8:2 Fluorotelomer phosphate diester   | 6:2/8:2-diPAP                           | 943913-15-3  | Wellington Laboratories (Guelph, ON, Canada) |
| <i>PFAS Internal Standards</i>            |                                         |              |                                              |
| <sup>13</sup> C <sub>4</sub> -PFBA        | <sup>13</sup> C <sub>4</sub> -PFBA      |              | Wellington Laboratories (Guelph, ON, Canada) |
| <sup>13</sup> C <sub>5</sub> -PFPeA       | <sup>13</sup> C <sub>5</sub> -PFPeA     |              | Wellington Laboratories (Guelph, ON, Canada) |
| <sup>13</sup> C <sub>2</sub> -PFHxA       | <sup>13</sup> C <sub>2</sub> -PFHxA     |              | Wellington Laboratories (Guelph, ON, Canada) |
| <sup>13</sup> C <sub>4</sub> -PFHpA       | <sup>13</sup> C <sub>4</sub> -PFHpA     |              | Wellington Laboratories (Guelph, ON, Canada) |
| <sup>13</sup> C <sub>4</sub> -PFOA        | <sup>13</sup> C <sub>4</sub> -PFOA      |              | Wellington Laboratories (Guelph, ON, Canada) |
| <sup>13</sup> C <sub>5</sub> -PFNA        | <sup>13</sup> C <sub>5</sub> -PFNA      |              | Wellington Laboratories (Guelph, ON, Canada) |
| <sup>13</sup> C <sub>2</sub> -PFDA        | <sup>13</sup> C <sub>2</sub> -PFDA      |              | Wellington Laboratories (Guelph, ON, Canada) |
| <sup>13</sup> C <sub>2</sub> -PFUdA       | <sup>13</sup> C <sub>2</sub> -PFUdA     |              | Wellington Laboratories (Guelph, ON, Canada) |
| <sup>13</sup> C <sub>2</sub> -PFDoA       | <sup>13</sup> C <sub>2</sub> -PFDoA     |              | Wellington Laboratories (Guelph, ON, Canada) |
| <sup>13</sup> C <sub>2</sub> -PFTeDA      | <sup>13</sup> C <sub>2</sub> -PFTeDA    |              | Wellington Laboratories (Guelph, ON, Canada) |
| <sup>13</sup> C <sub>2</sub> -PFHxDA      | <sup>13</sup> C <sub>2</sub> -PFHxDA    |              | Wellington Laboratories (Guelph, ON, Canada) |
| <sup>13</sup> C <sub>3</sub> -PFBS        | <sup>13</sup> C <sub>3</sub> -PFBS      |              | Wellington Laboratories (Guelph, ON, Canada) |
| <sup>13</sup> C <sub>2</sub> -PFOS        | <sup>13</sup> C <sub>2</sub> -PFOS      |              | Wellington Laboratories (Guelph, ON, Canada) |
| <sup>18</sup> O <sub>2</sub> -PFHxS       | <sup>18</sup> O <sub>2</sub> -PFHxS     |              | Wellington Laboratories (Guelph, ON, Canada) |
| <sup>13</sup> C <sub>4</sub> -PFOS        | <sup>13</sup> C <sub>4</sub> -PFOS      |              | Wellington Laboratories (Guelph, ON, Canada) |
| <sup>13</sup> C <sub>8</sub> -FOSA        | <sup>13</sup> C <sub>8</sub> -FOSA      |              | Wellington Laboratories (Guelph, ON, Canada) |
| MeFOSA- d <sub>3</sub>                    | MeFOSA- d <sub>3</sub>                  |              | Wellington Laboratories (Guelph, ON, Canada) |
| EtFOSA- d <sub>5</sub>                    | EtFOSA- d <sub>5</sub>                  |              | Wellington Laboratories (Guelph, ON, Canada) |
| MeFOSAA- d <sub>3</sub>                   | MeFOSAA- d <sub>3</sub>                 |              | Wellington Laboratories (Guelph, ON, Canada) |
| EtFOSAA- d <sub>5</sub>                   | EtFOSAA- d <sub>5</sub>                 |              | Wellington Laboratories (Guelph, ON, Canada) |
| <sup>13</sup> C <sub>2</sub> -4:2 FTS     | <sup>13</sup> C <sub>2</sub> -4:2 FTS   |              | Wellington Laboratories (Guelph, ON, Canada) |
| <sup>13</sup> C <sub>2</sub> -6:2 FTS     | <sup>13</sup> C <sub>2</sub> -6:2 FTS   |              | Wellington Laboratories (Guelph, ON, Canada) |
| <sup>13</sup> C <sub>2</sub> -8:2 FTS     | <sup>13</sup> C <sub>2</sub> -8:2 FTS   |              | Wellington Laboratories (Guelph, ON, Canada) |
| <sup>13</sup> C <sub>2</sub> -6:2 FTCA    | <sup>13</sup> C <sub>2</sub> -6:2 FTCA  |              | Wellington Laboratories (Guelph, ON, Canada) |
| <sup>13</sup> C <sub>2</sub> -8:2 FTCA    | <sup>13</sup> C <sub>2</sub> -8:2 FTCA  |              | Wellington Laboratories (Guelph, ON, Canada) |
| <sup>13</sup> C <sub>2</sub> -10:2 FTCA   | <sup>13</sup> C <sub>2</sub> -10:2 FTCA |              | Wellington Laboratories (Guelph, ON, Canada) |

|                                     |                                     |  |                                              |
|-------------------------------------|-------------------------------------|--|----------------------------------------------|
| $^{13}\text{C}_2\text{-6:2 UFTCA}$  | $^{13}\text{C}_2\text{-6:2 UFTCA}$  |  | Wellington Laboratories (Guelph, ON, Canada) |
| $^{13}\text{C}_2\text{-8:2 UFTCA}$  | $^{13}\text{C}_2\text{-8:2 UFTCA}$  |  | Wellington Laboratories (Guelph, ON, Canada) |
| $^{13}\text{C}_2\text{-10:2 UFTCA}$ | $^{13}\text{C}_2\text{-10:2 UFTCA}$ |  | Wellington Laboratories (Guelph, ON, Canada) |
| $^{13}\text{C}_3\text{-HFPO-DA}$    | $^{13}\text{C}_3\text{-HFPO-DA}$    |  | Wellington Laboratories (Guelph, ON, Canada) |

## Text S2. Site and Storm Characteristics

Site characteristics and sampling events are summarized in **Table S2** and **Table S3**, respectively.

**Table S2.** Summary of sampling sites and land-use characteristics by San Francisco Bay watershed. References for land-use data and characteristics are provided in SI Text S2 (Excel).

**Table S3.** Summary of sampling events and storm event characteristics for sampling in San Francisco Bay Area watersheds 2018-2022. Event 9 was a post-storm sampling event and does not include storm characteristics (Excel).

To better display the level of development within watersheds, the most recent, currently unpublished, land use dataset for the region [Metropolitan Transportation Commission (MTC). 2023. Interim 2020 San Francisco Bay Area Land Use data (draft)] was disaggregated into two sub-classes for each major land use category (residential, commercial, industrial, transportation, agriculture, open space, unclassified). One subclass is for the area of the parcels within a given land use category that have greater than 10% imperviousness, and the other is for the area of the parcels that have less than 10% imperviousness.

Percent imperviousness was calculated using a zonal statistics analysis based on data from Dewitz, J. (2021). *National Land Cover Database (NLCD) 2019 Impervious Products*. U.S. Geological Survey. <https://doi.org/10.5066/P9KZCM54>

Road lengths and types were extracted from the U.S. Census Bureau (2021) TIGER/Line 2020 Census Roads Shapefile. Released February 2, 2021. Accessed October 10, 2022. <https://www.census.gov/geographies/mapping-files/time-series/geo/tiger-line-file.2020.html#list-tab-790442341>

NLCD area was from Dewitz, J. (2021). *National Land Cover Database (NLCD) 2019 Impervious Products*. U.S. Geological Survey. <https://doi.org/10.5066/P9KZCM54>

### Text S3. Sample Collection Information

Sampling teams wore nitrile gloves for all sample collection activities. Storm durations were estimated based on the weather forecast, prevailing on-site conditions, and radar imagery. Additional sample collection methods are detailed in **Table S4**.

**Table S4.** Sample collection details by contaminant class

| Contaminant Class        | Collection Apparatus & Method                                                                                       | Bottle Type & Size               | Minimum Volume    | Head Space? | Bottle rinse in field?                              |
|--------------------------|---------------------------------------------------------------------------------------------------------------------|----------------------------------|-------------------|-------------|-----------------------------------------------------|
| SWCECs (including 6PPDQ) | ISCO pump; aliquots added directly to container, measured by pump times (field composite)                           | 1 x 2.5 L amber glass            | Full              | None        | Site water 3x                                       |
| PFASs                    | Stainless steel bailer; each aliquot filled tubes (composited in laboratory)                                        | 3 x 50 mL HDPE tubes per aliquot | Full              | Minimal     | No                                                  |
| OPEs and bisphenols      | Stainless steel bailer; standard volumes measured via graduated cylinder, then added to container (field composite) | 2 x 1 L amber glass              | 800 mL (shoulder) | OK          | Rinse outside of container with site water (cap on) |

#### Text S3.1 Class-specific sample collection techniques

Sample collection for SWCEC analysis used a pump (ISCO 6712 Portable Pump Sampler) fitted with a Teflon suction line attached to a sampling pole that was held in the deepest part of the channel. The suction line end was lowered/raised in the water column to create a depth-integrated sample. Sample collection for OPE, bisphenol, and PFAS analysis used a stainless-steel bailer (to avoid potential contamination from Teflon or other plastics) lowered into the center of the channel near the surface (i.e., not depth-integrated). The bailer was rinsed once with site water prior to sample collection. After sample collection, the bailer was agitated multiple times while decanting sample water into a glass graduated cylinder to measure sub-sample volumes that were collected into sample containers. All near-field and open Bay samples were collected with the stainless-steel bailer.

#### Text S3.2 Field blank sample collection

During storm event sampling, SWCEC blanks were collected at the beginning of the sampling event, before any other sample collection. MilliQ blank water (~2.5 L) was run through the ISCO pump to thoroughly rinse the equipment; this water was discarded. The pump was then similarly rinsed with Reagent Grade DI water (~0.5 L), just prior to pumping the same grade water into the field blank sample container. For PFASs, Optima LC/MS grade water or lab-supplied blank



water was poured into the stainless-steel bailer and then into the collection tubes. For OPEs and bisphenols, blank samples were collected by opening an empty sampling container at the same time as field sample collection, then closing it upon completion.

During near-field and mid-Bay sampling, SWCEC field blanks were collected at the beginning of the sampling event, before any other sample collection, by rinsing the clean bailer three times with MilliQ water, then filling the bailer with MilliQ water that was subsequently transferred to the field blank sample container.

## Text S4. Analytical Methods

### Text S4.1. Stormwater Tracer CECs (UWT)

**Sample Extraction.** Water samples (1 L) were spiked with an isotope labeled internal standard (ISTD) mixture (50  $\mu$ L; n=14; ISTD concentrations 2 – 20  $\mu$ g/L in final extracts, see **Table S7**) and 25 ng (50  $\mu$ L) 6PPDQ-*d*<sub>5</sub> (the latter only spiked in final extracts for samples collected 10/24/2021 and earlier). To prevent clogging, 0.5 g pre-cleaned micro glass beads (Filter Aid 400, 3M, MN) were added to SPE cartridges (200 mg, 6 mL Oasis HLB, Waters, MA). Cartridges were preconditioned (10 mL methanol, 25 mL DI water), then water samples (1 L) were loaded (5-10 mL/min). Cartridges were rinsed (10 mL DI water), dried for 15 min under vacuum, and eluted with methanol (4 x 2.5 mL). Eluates were concentrated to 1 mL under N<sub>2</sub>, transferred into autosampler vials, and were stored at -20 °C until instrumental analysis.

**LC-MS/MS Methods.** Analysis (for both the combined SWCEC/6PPDQ method and the 6PPDQ-specific method) was based on previously published methods.<sup>1,2</sup> The chromatography column and other LC parameters are provided in **Table S5**. Detection used electrospray ionization (ESI+) and dynamic multiple reaction monitoring mode; additional parameters are provided in **Table S6**. Quantitative and qualitative ion transitions are provided in Tian et al. and Hou et al.<sup>1,2</sup> Minimum levels of detection (MDL) and quantitation (MQL) for SWCECs are summarized in **Table S8**. The MDL and MQL for 6PPDQ were 2.5 and 5.1 ng/L in the original water sample, respectively.

**Table S5.** LC method settings for combined SWCEC/6PPDQ analysis and for 6PPDQ-specific analysis.

| Parameter            | SWCEC/Combined Method                                                                                                                                                                              | 6PPDQ-specific Method                                                                                           |
|----------------------|----------------------------------------------------------------------------------------------------------------------------------------------------------------------------------------------------|-----------------------------------------------------------------------------------------------------------------|
| LC column            | Eclipse Plus-C18, 2.1 mm×100 mm, 1.8 $\mu$ m particle size (Agilent, USA)                                                                                                                          | Poroshell HPH-C18, 2.1 × 100 mm, 2.7 $\mu$ m particle size (Agilent, USA)                                       |
| Guard column         | Zorbax Eclipse XDB-C18 Guard Column, 2.1×12.5 mm, 5 $\mu$ m particle size (Agilent, USA)                                                                                                           | Zorbax Eclipse XDB-C18 Guard Column, 2.1 × 12.5 mm, 5 $\mu$ m particle size (Agilent, USA)                      |
| Column temp          | 25°C                                                                                                                                                                                               | 45 °C                                                                                                           |
| Injection volume     | 10 $\mu$ L                                                                                                                                                                                         | 5 $\mu$ L                                                                                                       |
| Mobile phase         | DI water (A) and methanol (B), both with 5 mM ammonium acetate plus 0.1% ammonium hydroxide                                                                                                        | DI water (A) and methanol (B) both with 0.1% formic acid                                                        |
| Gradient & flow rate | 10% B 0-1 min, 60% B at 1 min, 100% B 10-12 min (0.2 mL/min flow rate), 100% B at 13-16 min (0.5 mL/min flow rate, to prevent peak-splitting for SDPAs), 10% B at 17-24 min (0.2 mL/min flow rate) | 0.2 mL/min; 50% B 0 – 0.5 min, 50-100% B 0.5-10.5 min, 100% B 10.5-12 min, 100-50% B 12-13 min, 50% B 13-15 min |

**Table S6.** MS/MS method settings for SWCEC analysis

| Parameter          | SWCEC/Combined Method | 6PPDQ-specific Method |
|--------------------|-----------------------|-----------------------|
| ESI mode           | +/-                   | +                     |
| Gas temp           | 350 °C                | 300 °C                |
| Gas flow           | 10 L/min              | 5 L/min               |
| Sheath gas temp    | 400 °C                | 400 °C                |
| Sheath gas flow    | 11 L/min              | 11 L/min              |
| Capillary voltage  | 3.5 kV                | 3.0 kV                |
| Nozzle voltage     | 0.5 kV                | 0.5 kV                |
| Nebulizer          | 45 psi                | 45 psi                |
| Fragmentor voltage | 110 V                 | 110 V                 |

**Table S7.** Summary of calibration ranges and internal standard (ISTD) information for targeted stormwater-derived analytes.

| Target Analyte                                                 | Calibration range (µg/L) | ISTD                                                       | ISTD Concentration in final extract (µg/L) |
|----------------------------------------------------------------|--------------------------|------------------------------------------------------------|--------------------------------------------|
| 6PPD-quinone (6PPDQ)                                           | 0.025 – 100              | 6PPDQ- <i>d</i> <sub>5</sub>                               | 25                                         |
| 1,3-diphenylguanidine (DPG)                                    | 0.1 – 100                | Diphenyl- <i>d</i> <sub>10</sub> -urea                     | 5                                          |
| Hexa(methoxymethyl)melamine (HMMM)                             | 0.05 – 100               | Prometon- <i>d</i> <sub>3</sub>                            | 2                                          |
| <i>N</i> -cyclohexyl-1,3-benzothiazole-2-amine (NCBA)          | 0.05 – 100               | 5-methyl-1- <i>H</i> -Benzotriazole- <i>d</i> <sub>6</sub> | 20                                         |
| 1,3-dicyclohexylurea (DCU)                                     | 0.05 – 100               | Diphenyl- <i>d</i> <sub>10</sub> -urea                     | 5                                          |
| Caprolactam                                                    | 2 – 200                  | Caffeine- <i>13</i> C <sub>3</sub>                         | 10                                         |
| Benzotriazole (BTR)                                            | 2 – 200                  | 5-methyl-1- <i>H</i> -Benzotriazole- <i>d</i> <sub>6</sub> | 20                                         |
| 5-methyl-1- <i>H</i> -benzotriazole (5-methyl-1 <i>H</i> -BTR) | 2 – 200                  | 5-methyl-1- <i>H</i> -Benzotriazole- <i>d</i> <sub>6</sub> | 20                                         |
| 2-amino-benzothiazole (2-NH <sub>2</sub> -BTH)                 | 0.2 – 100                | 5-methyl-1- <i>H</i> -Benzotriazole- <i>d</i> <sub>6</sub> | 20                                         |
| 2-hydroxy-benzothiazole (2-OH-BTH)                             | 1 – 100                  | 5-methyl-1- <i>H</i> -Benzotriazole- <i>d</i> <sub>6</sub> | 20                                         |
| 2-(4-morpholinyl)benzothiazole (2,4-MoBT)                      | 0.2 – 100                | 5-methyl-1- <i>H</i> -Benzotriazole- <i>d</i> <sub>6</sub> | 20                                         |
| Carbendazim                                                    | 0.05 – 100               | Carbendazim- <i>d</i> <sub>4</sub>                         | 5                                          |
| Clothianidin                                                   | 0.5 – 100                | Imidacloprid- <i>d</i> <sub>4</sub>                        | 20                                         |
| Diuron                                                         | 0.1 – 100                | Diuron- <i>d</i> <sub>6</sub>                              | 10                                         |
| Imidacloprid                                                   | 0.5 – 100                | Imidacloprid- <i>d</i> <sub>4</sub>                        | 20                                         |

|                         |            |                 |     |
|-------------------------|------------|-----------------|-----|
| Iprodione               | 5 – 500    | DEET-d7         | 20  |
| Mecoprop                | 1 – 100    | Diclofenac-d4   | 20  |
| Pentachlorophenol (PCP) | 5 – 500    | Triclosan-d3    | 25  |
| Prometon                | 0.02 – 100 | Prometon-d3     | 2   |
| Thiamethoxam            | 5 – 500    | Imidacloprid-d4 | 20  |
| Caffeine                | 0.5 – 100  | Caffeine-13C3   | 10  |
| Cetirizine              | 0.02 – 100 | Cetirizine-d8   | 1   |
| Cotinine                | 0.1 – 100  | Cotinine-d3     | 10  |
| DEET                    | 0.05 – 100 | DEET-d7         | 20  |
| Diclofenac              | 5 – 500    | Diclofenac-d4   | 20  |
| Ibuprofen               | 20 – 2000  | Ibuprofen-d3    | 200 |
| Triclosan               | 2 – 200    | Triclosan-d3    | 25  |

**Table S8.** Minimum, median, mean, and maximum MDLs and MQLs for SWCEC analytes across all analysis dates. Units are ng/L in the original water sample (Excel).

#### Text S4.2. 6PPDQ (Eurofins)

**Extraction/Cleanup:** Aqueous samples in 250 mL amber glass bottles with minimal headspace were briefly shaken and a small aliquot was taken for percent solids determination. Samples and QC were then fortified with 0.5 mL (20 µg/L) <sup>13</sup>C<sub>6</sub>-6PPDQ (internal standard used for isotope dilution quantitation) prior to SPE. SPE used 200 mg, 6 mL Strata-XL 100 µm polymeric reversed phase cartridges (Phenomenex, 8B-S043-FCH). The 100 µm cartridge was less prone to clogging than standard 30 µm and 60 µm cartridges and glass wool above the media was typically not needed. Cartridges were conditioned with acetonitrile and water prior to sample loading. Samples were loaded at a rate of 10-15 mL/minute, assuring cartridge did not go dry. After loading, the original sample bottle was washed with 5 mL 1:1 methanol:water and transferred to the SPE, then discarded to waste. The SPE was dried under vacuum for 5 minutes. The original sample bottle was washed with 5 mL acetonitrile and transferred to SPE, collecting eluent in a 15 mL PP tube after applying a small vacuum. This step was repeated once with 4 mL acetonitrile. Then, 0.5 mL (20 µg/L) of Injection Internal Standard 6PPDQ-*d*<sub>3</sub> was added and the extract volume was adjusted with acetonitrile to achieve 10 mL final volume. Samples were sealed and briefly vortexed before aliquoting a small volume for analysis.

**LC-MS/MS Analysis:** Extracts were analyzed on a SCIEX 5500+ paired with a Shimadzu Exion LC. 20 µL of extract was introduced into the Shimadzu HPLC system for separation on a 100 mm solid-core C18 column (Phenomenex, 00D-4744-E0). Detailed LC conditions are presented in **Table S9**. The MS was operated in positive polarity with a run time of approximately 10 minutes; detailed MS conditions are in **Table S10**. An initial calibration consisting of six points using an average response factor was injected prior to sample analysis (**Table S11**). Isotope dilution quantitation was employed and percent recovery of the <sup>13</sup>C<sub>6</sub>-6PPD-Q standard was generated for every sample and QC sample. Data were processed on an

internal Laboratory Information Management System (LIMS) and reviewed by two separate analysts. Any samples with concentrations above the calibration were diluted appropriately and reanalyzed. The MDL and MQL are summarized in **Table S12**.

**Table 9.** LC method settings for 6PPDQ analysis at Eurofins.

|                                                          |                                                |    |    |       |                   |
|----------------------------------------------------------|------------------------------------------------|----|----|-------|-------------------|
| Column (Column temp = 45°C)                              | Phenomenex Kinetex C18 3.5 µm, 3.6 mm x 100mm  |    |    |       |                   |
| Mobile Phase Composition                                 | A = 0.2% Formic acid in Water B = Acetonitrile |    |    |       |                   |
| Gradient Program<br>(Maximum Pressure limit = 7,500 psi) | Time                                           | %A | %B | Curve | Flow Rate mL/min. |
|                                                          | 0                                              | 90 | 10 | 0     | 0.60              |
|                                                          | 1.0                                            | 90 | 10 | 0     | 0.60              |
|                                                          | 3.0                                            | 45 | 55 | 0     | 0.60              |
|                                                          | 6.0                                            | 1  | 99 | 0     | 0.60              |
|                                                          | 8.0                                            | 1  | 99 | 0     | 0.60              |
|                                                          | 8.50                                           | 90 | 10 | 0     | 0.60              |
|                                                          | 9.0                                            | 90 | 10 | 0     | 0.60              |
| Injection Size                                           | 20 µL (fixed amount throughout the sequence)   |    |    |       |                   |
| Run Time                                                 | ~10.0 minutes                                  |    |    |       |                   |

**Table 10.** Mass spectrometer settings for 6PPDQ analysis at Eurofins.

| Parameter                     | Setting          |
|-------------------------------|------------------|
| MS Interface Mode             | ESI Positive Ion |
| Ion Spray Voltage (kV)        | 5.5              |
| Desolvation Temp              | 600°C            |
| Curtain Gas (nitrogen) Flow   | 305 psi          |
| Collision Gas (nitrogen) Flow | 58 psi           |

**Table 11.** Calibration standards for 6PPDQ analysis at Eurofins. \*Internal Standard used for isotope dilution quantitation. \*\*Injection Internal Standard. \*\*\*L1 is used for a sensitivity check and L2 is the low point for quantitation.

| Analyte     | Standard Level - Concentration (ng/mL) |      |     |     |    |    |    |
|-------------|----------------------------------------|------|-----|-----|----|----|----|
|             | L1***                                  | L2   | L3  | L4* | L5 | L6 | L7 |
| 6PPD-Q      | 0.025                                  | 0.05 | 0.1 | 0.5 | 1  | 5  | 10 |
| 13C6-6PPDQ* | 1                                      | 1    | 1   | 1   | 1  | 1  | 1  |
| 6PPDQ-d5**  | 1                                      | 1    | 1   | 1   | 1  | 1  | 1  |

**Table 12.** Summary of MDL and MQL for 6PPDQ analysis at Eurofins, ng/L in the water samples.

|     | Min  | Median | Mean | Max |
|-----|------|--------|------|-----|
| MDL | 0.54 | 3.0    | 2.0  | 3.1 |
| MQL | 1.7  | 10     | 6.7  | 10  |

### Text S4.3. OPEs and Bisphenols

**Sample Extraction.** Filtered water samples (~1 L) were adjusted to pH ~3, spiked with isotope dilution internal standards (10 ng for OPEs and 20 ng for bisphenols; ISTD concentrations 50 – 100 µg/L in final extracts, see **Table S15**), then liquid-liquid extracted with dichloromethane (DCM) three times. Extracts were combined, concentrated (to 200 µL), and divided into two equal volume aliquots. One aliquot was solvent-exchanged to hexane (HEX; 200 µL) and cleaned further by passing through an SPE cartridge (1 g ammonium silica; Biotage, Charlotte, NC). The SPE cartridge was then cleaned (2 mL of HEX:DCM, 20:80 v/v), and eluted (4 mL HEX:DCM, 20:80 v/v; 8 mL DCM). The final extract (~200 µL) was spiked with an injection internal standard (<sup>13</sup>C<sub>18</sub>-TPhP, 10 ng) for OPE analysis. The second aliquot was concentrated to near dryness under gentle nitrogen flow, re-constituted with 200 µL methanol, and spiked with internal standard (d<sub>16</sub>-BPA, 10 ng) for bisphenol analysis.

Dried particulates retained after initial filtration were spiked with isotope dilution internal standards (10 ng for OPEs and 20 ng for bisphenols; ISTD concentrations 50 – 100 µg/L in final extracts, see **Table S15**), and extracted twice with ultrasonication (5 mL of HEX:DCM, 1:1 v/v; 5 min). Extracts were combined, concentrated (to 200 µL), and divided into two equal volume aliquots. Subsequent processing of the two aliquots for OPE and bisphenol analysis followed the same procedures detailed above.

**LC-MS/MS Methods.** Analysis of OPEs and bisphenols was based on previously published methods.<sup>3</sup> LC-MS/MS analyses used a Shimadzu HPLC coupled to an AB Sciex Q Trap 5500 MS equipped with a TurboIonSpray® ESI probe. The chromatography column and other LC parameters are provided in **Table S13**. Detection used ESI+ for OPE analysis and ESI- for bisphenol analysis and MRM; additional parameters are provided in **Table S14** and **Table S15**.

**Table S13.** LC method settings for OPE and bisphenol analysis.

| Parameter            | OPE Method                                                                                                                 | Bisphenol Method                                                                      |
|----------------------|----------------------------------------------------------------------------------------------------------------------------|---------------------------------------------------------------------------------------|
| LC column            | Kinetex EVO C18, 100Å, 2.1 mm×100 mm, 5 µm particle size (Phenomenex, USA)                                                 | ZORBAX Extended-C18, 80Å, 2.1 × 100 mm, 3.5 µm particle size (Agilent, USA)           |
| Guard column         | SecurityGuard ULTRA cartridges for EV0-C18, sub-2µm and core-shell columns with 2.1mm internal diameters (Phenomenex, USA) | ZORBAX Extend-C18, 80Å Guard Column, 2.1 × 12.5 mm, 5 µm particle size (Agilent, USA) |
| Column temp          | 40°C                                                                                                                       | 40°C                                                                                  |
| Injection volume     | 5 µL                                                                                                                       | 5 µL                                                                                  |
| Mobile phase         | Water with 0.1% formic acid (A) and methanol (B)                                                                           | Water with 0.2mM ammonium acetatae (A) and methanol (B)                               |
| Gradient & flow rate | 0.3 mL/min; 5% B 0-2 min, 5-40% B 2-4 min, 40-100% B 4-14 min,                                                             | 0.5 mL/min; 10% B 0-0.5 min, 10-50% B 0.5-1 min, 50-100% B 1-7                        |

|  |                                                          |                                                                  |
|--|----------------------------------------------------------|------------------------------------------------------------------|
|  | 100% B 14-17 min, 100-5% B 17-17.1 min, 5% B 17.1-20 min | min, 100% B 7-8.5 min, 100-10% B 8.5-8.6 min, 10% B 8.6-10.5 min |
|--|----------------------------------------------------------|------------------------------------------------------------------|

**Table S14.** MS/MS method settings for OPE and bisphenol analysis.

| Parameter              | OPE Method | Bisphenol Method |
|------------------------|------------|------------------|
| ESI mode               | +          | -                |
| Ion source temperature | 350°C      | 450°C            |
| Curtain gas            | 20 psi     | 35 psi           |
| Collision gas          | 9          | 9                |
| IonSpray Voltage       | 4000 V     | -4500 V          |
| Ion source gas 1       | 50 psi     | 45 psi           |
| Ion source gas 2       | 20 psi     | 45 psi           |

**Table S15.** Summary of MRM transitions (quantitative and qualitative, respectively) and internal standard (ISTD) information (used for isotope dilution quantitation) for OPEs and bisphenols.

| Analyte  | MRM Pairs<br>( <i>m/z</i> )                           | ISTD                      | ISTD Conc. in final<br>extract ( $\mu\text{g/L}$ ) |
|----------|-------------------------------------------------------|---------------------------|----------------------------------------------------|
| V6       | 582.9 $\rightarrow$ 99.1<br>582.9 $\rightarrow$ 65.1  | $d_{15}$ -TDCIPP          | 50                                                 |
| TCEP     | 284.9 $\rightarrow$ 99<br>284.9 $\rightarrow$ 62.9    | $d_{12}$ -TCEP            | 50                                                 |
| TCIPP    | 329 $\rightarrow$ 99<br>329 $\rightarrow$ 81          | $d_{15}$ -TDCIPP          | 50                                                 |
| TDCIPP   | 430.9 $\rightarrow$ 99<br>430.9 $\rightarrow$ 81      | $d_{15}$ -TDCIPP          | 50                                                 |
| TDBPP    | 698.4 $\rightarrow$ 98.9<br>698.4 $\rightarrow$ 118.9 | $d_{15}$ -TPhP            | 50                                                 |
| TTBNPP   | 1018.5 $\rightarrow$ 145<br>1018.5 $\rightarrow$ 147  | $d_{15}$ -TPhP            | 50                                                 |
| BPA-BDPP | 693 $\rightarrow$ 367.2<br>693 $\rightarrow$ 178.2    | $d_{15}$ -TPhP            | 50                                                 |
| RBDPP    | 575 $\rightarrow$ 152.2<br>575 $\rightarrow$ 77.1     | $d_{15}$ -TPhP            | 50                                                 |
| T35DMPP  | 411.1 $\rightarrow$ 179.1<br>411.1 $\rightarrow$ 194  | $d_{15}$ -TPhP            | 50                                                 |
| CrDPP    | 340.9 $\rightarrow$ 151.9<br>340.9 $\rightarrow$ 91.1 | $d_{15}$ -TPhP            | 50                                                 |
| IDDPP    | 391 $\rightarrow$ 251.1<br>391 $\rightarrow$ 77.1     | $d_{15}$ -TPhP            | 50                                                 |
| EHDPP    | 363.2 $\rightarrow$ 250.9<br>363.2 $\rightarrow$ 76.9 | $M_6$ -TBOEP <sup>a</sup> | 50                                                 |
| TPhP     | 327.1 $\rightarrow$ 77.1<br>327.1 $\rightarrow$ 152.1 | $d_{15}$ -TPhP            | 50                                                 |
| TMPP     | 369.1 $\rightarrow$ 165<br>369.1 $\rightarrow$ 91     | $M_6$ -TBOEP <sup>a</sup> | 50                                                 |
| TBOEP    | 399.1 $\rightarrow$ 199.1                             | $M_6$ -TBOEP <sup>a</sup> | 50                                                 |

|           |                                |                                    |     |
|-----------|--------------------------------|------------------------------------|-----|
|           | 399.1 → 101                    |                                    |     |
| TEHP      | 435.3 → 99<br>435.3 → 81       | M <sub>6</sub> -TBOEP <sup>a</sup> | 50  |
| TiBP      | 267.1 → 80.9<br>267.1 → 98.9   | d <sub>27</sub> -TnBP              | 50  |
| TPrP      | 225.1 → 80.9<br>225.1 → 98.9   | d <sub>15</sub> -TDCIPP            | 50  |
| TnBP      | 267.1 → 80.9<br>267.1 → 98.9   | d <sub>27</sub> -TnBP              | 50  |
| TEP       | 183.1 → 81<br>183.1 → 99       | d <sub>15</sub> -TEP               | 50  |
| 2iPPDPP   | 369.2 → 327<br>369.2 → 233     | d <sub>15</sub> -TPhP              | 50  |
| 4iPPDPP   | 369.2 → 327<br>369.2 → 233     | d <sub>15</sub> -TPhP              | 50  |
| 24DiPPDPP | 411.2 → 369<br>411.2 → 327     | d <sub>15</sub> -TPhP              | 50  |
| B2iPPP    | 411.3 → 369<br>411.3 → 327     | d <sub>15</sub> -TPhP              | 50  |
| B4iPPP    | 411.3 → 369<br>411.3 → 327     | d <sub>15</sub> -TPhP              | 50  |
| B24DiPPP  | 495.3 → 411<br>495.3 → 369     | d <sub>15</sub> -TPhP              | 50  |
| T2iPPP    | 452.9 → 326.9<br>452.9 → 91    | d <sub>15</sub> -TPhP              | 50  |
| T3iPPP    | 453.2 → 411.3<br>453.2 → 369.3 | d <sub>15</sub> -TPhP              | 50  |
| T4iPPP    | 453.2 → 411.3<br>453.2 → 369.3 | d <sub>15</sub> -TPhP              | 50  |
| 2tBPDPP   | 383.1 → 327<br>383.1 → 251     | d <sub>15</sub> -TPhP              | 50  |
| 4tBPDPP   | 383.1 → 327<br>383.1 → 233     | d <sub>15</sub> -TPhP              | 50  |
| B2tBPPP   | 439.3 → 383.2<br>439.3 → 327   | d <sub>15</sub> -TPhP              | 50  |
| B4tBPPP   | 439.3 → 383<br>439.3 → 327     | d <sub>15</sub> -TPhP              | 50  |
| T4tBPP    | 495.3 → 439<br>495.3 → 383     | d <sub>15</sub> -TPhP              | 50  |
| BPA       | 226.8 → 132.9<br>226.8 → 92.9  | d <sub>6</sub> -BPA                | 100 |
| BPAF      | 335.1 → 264.9<br>335.1 → 69.1  | d <sub>6</sub> -BPA                | 100 |
| BPAP      | 289.1 → 211<br>289.1 → 195     | d <sub>6</sub> -BPA                | 100 |
| BPB       | 240.9 → 211<br>240.9 → 93      | d <sub>6</sub> -BPA                | 100 |
| BPBP      | 351.1 → 272.8<br>351.1 → 258.1 | d <sub>6</sub> -BPA                | 100 |
| BPC       | 255.1 → 146.7                  | d <sub>6</sub> -BPA                | 100 |



|                |                                |                      |     |
|----------------|--------------------------------|----------------------|-----|
|                | 255.1 → 107.2                  |                      |     |
| BPC-dichloride | 280.2 → 97<br>280.2 → 134      | d <sub>6</sub> -BPA  | 100 |
| BPE            | 213.1 → 118.8<br>213.1 → 92.7  | d <sub>6</sub> -BPA  | 100 |
| BPF            | 198.9 → 92.9<br>198.9 → 77     | d <sub>10</sub> -BPF | 100 |
| BPG            | 311.0 → 175.3<br>311.0 → 182.9 | d <sub>6</sub> -BPA  | 100 |
| BPM            | 345.1 → 251.1<br>345.1 → 132.7 | d <sub>6</sub> -BPA  | 100 |
| BPP            | 345.2 → 132.9<br>345.2 → 315.4 | d <sub>6</sub> -BPA  | 100 |
| BPPH           | 379.1 → 208.8<br>379.1 → 192.9 | d <sub>6</sub> -BPA  | 100 |
| BPS            | 248.9 → 108<br>248.9 → 92.1    | d <sub>8</sub> -BPS  | 100 |
| BP-TMC         | 309.2 → 215.2<br>309.2 → 183   | d <sub>6</sub> -BPA  | 100 |
| BPZ            | 267.1 → 173.2<br>267.1 → 145   | d <sub>6</sub> -BPA  | 100 |
| BADGE          | 339.3 → 119<br>339.3 → 197     | d <sub>6</sub> -BPA  | 100 |

**Table S16.** Minimum, median, mean, and maximum MDLs and MQLs for bisphenol and OPE analytes across all analyses. Units are ng/L in the original water sample. \*Denotes semi-quantitative analytes (Excel).

#### Text S4.4. PFASs, Colorado School of Mines

Sample preparation at Colorado School of Mines (Mines) started with creation of triplicate composite total water samples by combining replicate time-paced sub-samples (first shaken for 60 seconds) into an HDPE bottle. Based on a previously published method,<sup>4</sup> composite samples were sub-sampled (2 mL) and prepared for analysis by adding 0.528 mL methanol, 0.292 mL isopropyl alcohol, 0.101 mL basic water (0.01% ammonium hydroxide in water), 0.303 mL 2,2,2-trifluoroethanol, and 0.112 mL isotope-labeled PFAS ISTD mixture (2,000 ng/L; **Table S17**). Samples were vortexed (60 sec) then sonicated (1 h, 50-55°C).

Sample analysis at Mines used HPLC coupled to a SCIEX X500R QTOF-MS system and followed a previously published method.<sup>4</sup> Quantitative data acquisition and processing was completed using SCIEX OS Version 1.5.0. Confirmation of targeted analytes with signal to noise ratio > 10:1 is based on retention time and accurate mass (XIC window 0.02 Da) compared to analytical standards. Generally, a mass error of <5 ppm was considered acceptable. Initial

integration parameters included defining 90% of lowest-intensity peaks as noise, using a baseline-subtract window of two minutes, a minimum peak height of 10, a peak width of 3 points, and a gaussian smooth value of 1. Peaks that fell outside of these thresholds were manually integrated where retention time, accurate mass, and isotope confidence were determined to be satisfactory. Only concentrations above the MQL were reported. Additional parameters are provided in **Table S17**, and MDLs/MQLs are summarized in **Table S18**.

**Table S17.** Mines laboratory list of targeted PFASs, calibration ranges, and corresponding internal standards.

| PFAS               | Calibration Range | ISTD        | ISTD Conc. in final extract (µg/L) |
|--------------------|-------------------|-------------|------------------------------------|
| PFPeA              | 20 – 5000         | 13C5-PFPeA  | 200                                |
| PFHxA              | 2.0 – 5000        | 13C2-PFHxA  | 200                                |
| PFHpA              | 2.0 – 1000        | 13C4-PFHpA  | 200                                |
| PFOA               | 0.5 – 2000        | 13C4-PFOA   | 200                                |
| PFNA               | 10 – 1000         | 13C5-PFNA   | 200                                |
| PFDA               | 1.0 – 1000        | 13C2-PFDA   | 200                                |
| PFUnDA             | 2.0 – 1000        | 13C2-PFUdA  | 200                                |
| PFDoDA             | 1.0 – 2000        | 13C2-PFDoA  | 200                                |
| PFTTrDA            | 1.0 – 2000        | 13C2-PFTeDA | 200                                |
| PFTeDA             | 1.0 – 2000        | 13C2-PFTeDA | 200                                |
| PFHxDA             | 0.1 – 500         | 13C2-PFHxDA | 200                                |
| PFODA              | 0.1 – 500         | 13C2-PFHxDA | 200                                |
| PFPrS              | 0.1 – 5000        | 13C3-PFBS   | 200                                |
| PFBS               | 0.1 – 5000        | 13C3-PFBS   | 200                                |
| PFPeS              | 0.1 – 5000        | 13C2-PFOS   | 200                                |
| PFHxS <sup>1</sup> | 0.5 – 5000        | 18O2-PFHxS  | 200                                |
| PFHpS              | 0.1 – 5000        | 18O2-PFHxS  | 200                                |
| PFOS <sup>1</sup>  | 5.0 – 5000        | 13C4-PFOS   | 200                                |
| PFNS               | 1.0 – 5000        | 13C4-PFOS   | 200                                |
| PFDS               | 1.0 – 5000        | 13C4-PFOS   | 200                                |
| PFDoDS             | 2.0 – 1000        | 13C4-PFOS   | 200                                |
| 8Cl-PFOS           | 1.0 – 5000        | 13C4-PFOS   | 200                                |
| F-53B-major        | 1.0 – 5000        | 13C4-PFOS   | 200                                |
| F-53B-minor        | 2.0 – 5000        | 13C4-PFOS   | 200                                |
| PFOSA              | 2.0 – 5000        | 13C8-FOSA   | 200                                |
| NMeFOSA            | 5.0 – 2000        | d3-MeFOSA   | 200                                |
| NEtFOSA            | 5.0 – 1000        | d5-EtFOSA   | 200                                |
| FOSAA              | 5.0 – 500         | d3-MeFOSAA  | 200                                |
| NMeFOSAA           | 50 – 2000         | d3-MeFOSAA  | 200                                |
| NEtFOSAA           | 1.0 – 500         | d5-EtFOSAA  | 200                                |

|            |             |                 |     |
|------------|-------------|-----------------|-----|
| 4:2 FTS    | 5.0 – 1000  | 13C2-4:2 FTS    | 200 |
| 6:2 FTS    | 2.0 – 500   | 13C2-6:2 FTS    | 200 |
| 8:2 FTS    | 1.0 – 2000  | 13C2-8:2 FTS    | 200 |
| 10:2 FTS   | 2.0 – 500   | 13C2-8:2 FTS    | 200 |
| 3:3 FTCA   | 10 – 2000   | 13C2-6:2 FTCA   | 200 |
| 5:3 FTCA   | 5.0 - 5000  | 13C2-8:2 FTCA   | 200 |
| 7:3 FTCA   | 5.0 - 10000 | 13C2-10:2 FTCA  | 200 |
| 6:2 FTCA   | 2.0 – 500   | 13C2-6:2 FTCA   | 200 |
| 8:2 FTCA   | 5.0 – 5000  | 13C2-8:2 FTCA   | 200 |
| 10:2 FTCA  | 2.0 – 5000  | 13C2-10:2 FTCA  | 200 |
| 6:2 FTUCA  | 1.0 – 10000 | 13C2-6:2 UFTCA  | 200 |
| 8:2 FTUCA  | 1.0 – 10000 | 13C2-8:2 UFTCA  | 200 |
| 10:2 FTUCA | 1.0 – 2000  | 13C2-10:2 UFTCA | 200 |
| ADONA      | 0.5 - 5000  | 13C4-PFOA       | 200 |
| HFPO-DA    | 5.0 - 1000  | 13C3-HFPO-DA    | 200 |

- i. Exist in the standard as the linear and branched isomers.
- ii. PFHxDA, PFODA, FOSAA, MeFOSAA, and EtFOSAA excluded from high-level (>3.85 ng/mL) calibration standards to prevent instrument carryover.

**Table S18.** Minimum, median, mean, and maximum MDLs and MQLs for PFASs, by laboratory, across all analyses. Units are ng/L in the original water sample. \*Denotes semi-quantitative analytes (Excel).

#### Text S4.5. PFASs, Eurofins West Sacramento

Sample preparation at Eurofins started with creation of single, composited total water samples by combining up to five storm event sub-samples. Each sub-sample was fortified with PFAS ISTDs (total concentration 1.25-2.5 ng/mL in final sample extract; **Table S19**), briefly vortexed, allowed to equilibrate ( $\geq 10$  min), and centrifuged (3300 RCF, 5 min). Supernatants were composited into a 250-mL HDPE bottle, gently inverted, and extracted using multi-phase SPE (500 mg weak-anion exchange [WAX]/50 mg graphite carbon black [GCB]). Original sub-sample tubes were serially rinsed with 8 mL of 0.4% ammonium acetate in methanol. The final tube was centrifuged (3300 RCF, 5 min); the basic methanolic supernatant was used to rinse the 250-mL bottle and then to elute the WAX/GCB SPE. Eluents were adjusted to 80:20 methanol:water, briefly vortexed, and stored at 2-6 °C prior to analysis.

Sample analysis at Eurofins used an Exion LC system with two pumps and a C18 analytical column. Detection used a SCIEX 5500 mass spectrometer with ESI- and MRM. The mobile phases were 25 mM ammonium acetate in methanol (A) and methanol (B). A delay column was plumbed after the mixer and prior to the analytical column to distinguish any system background from positive detections. Separation of analytes (20  $\mu$ L injection) occurred on a C18 analytical

column (Phenomenex Gemini C18 3 $\mu$ m; 50x3 mm) before introduction into the instrument source. Detection used negative polarity electrospray ionization with data acquired in MRM mode (minimum 10 scans per peak). Additional parameters are provided in **Table S19**, and MDLs/MQLs are summarized in **Table S18**.

**Table S19.** Eurofins laboratory list of targeted PFASs, calibration ranges, and corresponding internal standards.

| Targeted PFAS  | Isotopic Analog | Typical RT (minutes) | Calibration Range (ng/L) | ISTD Conc. in final extract ( $\mu$ g/L) |
|----------------|-----------------|----------------------|--------------------------|------------------------------------------|
| PFPPrA         | 13C4 PFBA       | 2.54                 | 2.0-800                  | 0.025                                    |
| PFMOAA         | 13C4 PFBA       | 2.54                 | 2.0-800                  | 0.025                                    |
| R-EVE          | 13C4 PFBA       | 2.54                 | 5.0-800                  | 0.025                                    |
| PFBA           | 13C4 PFBA       | 2.54                 | 2.0-800                  | 0.025                                    |
| PMPA           | 13C4 PFBA       | 2.54                 | 2.0-800                  | 0.025                                    |
| PFPPrS         | 13C3-PFBS       | 2.98                 | 2.0-800                  | 0.025                                    |
| NVHOS          | 13C4 PFBA       | 2.54                 | 3.0-800                  | 0.025                                    |
| PFECA-F        | 13C5 PFPeA      | 2.97                 | 2.0-800                  | 0.025                                    |
| PFO2HxA        | 13C5 PFPeA      | 2.97                 | 2.0-800                  | 0.025                                    |
| PEPA           | 13C5 PFPeA      | 2.97                 | 2.0-800                  | 0.025                                    |
| 3:3 FTCA       | 13C3-PFBS       | 2.98                 | 2.0-800                  | 0.025                                    |
| PFPeA          | 13C5 PFPeA      | 2.97                 | 2.0-800                  | 0.025                                    |
| PFBS           | M3-PFBS         | 2.98                 | 2.0-800                  | 0.025                                    |
| PFECA-A        | 13C5 PFPeA      | 2.97                 | 2.0-800                  | 0.025                                    |
| PES            | 13C3-PFBS       | 2.98                 | 2.0-800                  | 0.025                                    |
| PFPeS          | 13C3-PFBS       | 2.98                 | 2.0-800                  | 0.025                                    |
| 4:2 FTS        | M2-4:2FTS       | 3.28                 | 2.0-800                  | 0.025                                    |
| PFECA-B        | 13C2 PFHxA      | 3.35                 | 2.0-800                  | 0.025                                    |
| PFO3OA         | 13C2 PFHxA      | 3.35                 | 2.0-800                  | 0.025                                    |
| PFHxA          | 13C2 PFHxA      | 3.35                 | 2.0-800                  | 0.025                                    |
| HFPO-DA        | 13C3 HFPO-DA    | 3.46                 | 4.0-800                  | 0.025                                    |
| R-PSDCA        | 13C4 PFHpA      | 3.74                 | 3.0-800                  | 0.025                                    |
| Hydro-EVE Acid | 13C4 PFHpA      | 3.74                 | 2.0-800                  | 0.025                                    |
| 5:3 FTCA       | 13C-6:2 FTCA    | 3.77                 | 2.0-800                  | 0.025                                    |
| PFO4DA         | 13C4 PFHpA      | 3.74                 | 2.0-800                  | 0.025                                    |
| PFHpA          | 13C4 PFHpA      | 3.74                 | 2.0-800                  | 0.025                                    |
| PFHxS          | 18O2 PFHxS      | 3.74                 | 2.0-800                  | 0.025                                    |
| Hydro-PS-Acid  | 13C4 PFHpA      | 3.74                 | 2.0-800                  | 0.025                                    |
| 6:2 FTUCA      | 13C-6:2 FTUCA   | 3.75                 | 2.0-800                  | 0.025                                    |
| 6:2 FTCA       | 13C-6:2 FTCA    | 3.77                 | 2.0-800                  | 0.025                                    |
| PFPE-1         | 13C-6:2 FTCA    | 3.77                 | 2.0-800                  | 0.025                                    |
| PS-Acid        | 13C4 PFOA       | 4.14                 | 2.0-800                  | 0.025                                    |
| EVE-Acid       | 13C4 PFOA       | 4.14                 | 2.0-800                  | 0.025                                    |
| PFECHS         | 13C4 PFOA       | 4.14                 | 2.0-800                  | 0.025                                    |
| 6:2 FTS        | M2-6:2FTS       | 4.12                 | 5.0-800                  | 0.025                                    |
| PFOA           | 13C4 PFOA       | 4.14                 | 2.0-800                  | 0.025                                    |

|               |                |      |         |       |
|---------------|----------------|------|---------|-------|
| PFO5DA        | 13C4 PFOA      | 4.14 | 2.0-800 | 0.025 |
| ADONA         | 13C4 PFOS      | 4.5  | 2.0-800 | 0.025 |
| PFHpS         | 13C4 PFOS      | 4.5  | 2.0-800 | 0.025 |
| 8:2 FTUCA     | 13C-8:2 FTUCA  | 4.5  | 2.0-800 | 0.025 |
| PFOS          | 13C4 PFOS      | 4.5  | 2.0-800 | 0.025 |
| F-53B-major   | 13C4 PFOS      | 4.5  | 2.0-800 | 0.025 |
| PFDS          | 13C4 PFOS      | 4.5  | 2.0-800 | 0.025 |
| 11Cl-PF3OUdS  | 13C4 PFOS      | 4.5  | 2.0-800 | 0.025 |
| PFNA          | 13C5 PFNA      | 4.52 | 2.0-800 | 0.025 |
| 8:2 FTCA      | 13C-8:2 FTCA   | 4.55 | 2.0-800 | 0.025 |
| 7:3 FTCA      | 13C-8:2 FTCA   | 4.55 | 2.0-800 | 0.025 |
| PFOSA         | 13C8 PFOSA     | 4.82 | 2.0-800 | 0.025 |
| PFNS          | 13C4 PFOS      | 4.5  | 2.0-800 | 0.025 |
| PFDoS         | 13C4 PFOS      | 4.5  | 2.0-800 | 0.025 |
| PFDA          | 13C2 PFDA      | 4.86 | 2.0-800 | 0.025 |
| 8:2 FTS       | M2-8:2FTS      | 4.86 | 2.0-800 | 0.025 |
| NMeFOSAA      | d3-MeFOSAA     | 5.03 | 5.0-800 | 0.025 |
| 10:2 FTUCA    | 13C-10:2 FTUCA | 5.18 | 2.0-800 | 0.025 |
| 10:2 FTCA     | 13C-10:2 FTCA  | 5.18 | 2.0-800 | 0.025 |
| PFUnDA        | 13C2 PFUnDA    | 5.19 | 2.0-800 | 0.025 |
| NEtFOSAA      | d5-EtFOSAA     | 5.19 | 5.0-800 | 0.025 |
| NMeFOSE       | d7N-MeFOSE     | 5.25 | 4.0-800 | 0.025 |
| NMeFOSA       | d3MeFOSA       | 5.26 | 2.0-800 | 0.025 |
| NEtFOSE       | d9N-EtFOSE     | 5.4  | 2.0-800 | 0.025 |
| EtFOSA        | d5EtFOSA       | 5.44 | 2.0-800 | 0.025 |
| PFDoA         | 13C2 PFDoA     | 5.47 | 2.0-800 | 0.025 |
| 10:2 FTS      | M2-10:2FTS     | 5.48 | 2.0-800 | 0.025 |
| PFTTrDA       | 13C2 PFDoA     | 5.47 | 2.0-800 | 0.025 |
| PFTeDA        | 13C2 PFTeDA    | 5.99 | 2.0-800 | 0.025 |
| PFHxDA        | 13C2 PFHxDA    | 6.39 | 2.0-800 | 0.025 |
| PFODA         | 13C2 PFHxDA    | 6.39 | 2.0-800 | 0.025 |
| 6:2 diPAP     | 13C4-6:2 diPAP | 6.87 | 2.0-800 | 0.025 |
| 6:2/8:2 diPAP | 13C4-6:2 diPAP | 7.36 | 2.0-800 | 0.025 |
| 8:2 diPAP     | 13C4-8:2 diPAP | 7.79 | 2.0-800 | 0.025 |
| 10:2 diPAP    | 13C4-6:2 diPAP | 8.83 | 2.0-800 | 0.025 |

## **Text S5. QA/QC**

### Text S5.1. SWCECs (including 6PPDQ)

Analytes with quality assurance measures outside the semi-quantitative range, including recoveries below 25% or above 400%, and/or relative percent difference or relative standard deviation (RPD/RSD) above 120%, included caprolactam, diclofenac, and iprodione.

Blanks and Spikes. Duplicate method banks (1 L ultrapure water spiked with ISTDs) were extracted and analyzed in every batch. Matrix spikes were performed (duplicate or triplicate) when sufficient field water was available, either using a specific field sample or a pooled (mixed) sample (50 µL methanolic spike, n=24 stormwater-derived analytes other than 6PPDQ, 50 – 500 ng/L in water). A matrix blank was processed alongside matrix spike samples to account for background occurrence of target analytes. The mean recoveries of target analytes in the matrix spike sample (excluding semi- or non-quantitative analytes, benzotriazole, and 5-methyl-1H-benzotriazole) ranged from 69% to 230%. Relative percent differences (RPDs) for matrix-spike replicates were 39% or better.

### Text S5.2. OPEs and Bisphenols

Based on QA review of the spiked recovery samples and lab duplicates (discussed in detail below), semi-quantitative results included the particulate fraction for resorcinol bis (diphenyl phosphate) (RBDPP) and triphenyl phosphate (TPhP).

Blanks and Spikes. Matrix spiking tests were conducted to evaluate method recovery efficiency. Known amounts of target analytes (10 ng each for OPEs and 20 ng each for bisphenols; same for aqueous and particulate spikes) as well as isotope dilution internal standards were spiked into a pooled water sample (i.e., filtered water from multiple field samples was pooled) that was subsequently split into three replicates and extracted/analyzed as described in the main text and Text S4.3. A matrix blank (i.e., pooled water spiked with isotope dilution internal standards only) was also processed. For particulates, spiking tests were conducted with pre-cleaned sodium sulfate and processed in three replicates along with a matrix blank. The mean recoveries of target analytes from the matrix spiking tests ranged from 72.4 (±3.6)% to 91.8 (±8.6)% for aqueous analysis and 74.7 (±4.9)% to 94.6 (±4.2)% for particulate analysis. Relative standard deviations (RSDs) for matrix-spike replicates averaged within 5% or better.

Field Sample Concentration Correction. Quantitation used isotope dilution methods, with analyte concentrations inherently corrected based on the recoveries of corresponding internal standards. Results for field samples were also blank corrected. Dissolved bisphenols A, F, and S, EHDPHP, TBOEP, TCEP, TCIPP, TDCIPP, TEHP, TMPP, TNBP, TPhP contamination was observed in

laboratory blanks (average 0.2, 0.1, 0.6, 0.02, 1.26, 0.2, 0.7, 0.6, 0.02, 0.02, 0.3, 0.2 ng/L, respectively), constituting less than 7% of the median concentrations measured in field samples. Particulate bisphenols A and F, 24DIPDPP, 2IPDPP, 2tBPDPP, 4IPDPP, 4tBPDPP, EHDPHP, TBOEP, TCEP, TCIPP, TDCIPP, TEHP, TEP, TIBP, TMPP, TPhP contamination was observed in laboratory blanks (averages 1.6, 0.3, 0.6, 0.6, 0.6, 1.2, 0.4, 1.2, 0.3, 0.3, 0.4, 0.3, 0.3, 0.3, 1.2, 0.4 ng/L, respectively), constituting less than 3% of the median concentrations measured in field samples. The field blanks indicated modest levels of potential background contamination with TBOEP(0.5 ng/L), TCEP (0.7 ng/L), TCIPP (1.1 ng/L), TDCIPP (0.7 ng/L), TNBP (0.2 ng/L), and TPhP (0.1 ng/L). Final concentration data were reported after subtracting the average contamination levels in laboratory blanks or field blanks. For compounds detectable in both laboratory and field blanks, higher contamination levels were used for blank subtraction.

### Text S5.3. PFASs – Mines

Based on QA review of the spiked recovery samples and lab duplicates (discussed in detail below), semi-quantitative analytes include perfluorooctadecanoate (PFODA) and 6:2 FTCA.

Blanks and Spikes. Field staff obtained field blank samples from one storm during the first wet season using Optima LC/MS grade water. In addition to this, method blanks consisting of Optima LC/MS grade water were prepared alongside samples processed on January 9, 2019 and January 18, 2019. Laboratory blanks (all reagents plus internal standards), double blanks (all reagents without internal standards), and quality control spiked samples (all reagents + internal standards + 300 pg of target PFASs) were prepared directly in autosampler vials at the same percent composition water, methanol, basic water, isopropanol, and 2,2,2-trifluoroethanol as the samples. A trio of one laboratory blank, one double blank, and one quality control spiked sample was prepared and analyzed after every 10 samples. All blanks were used to monitor contamination.

Additionally, three additional field samples were spiked with PFASs and prepared to assess PFAS recovery and matrix effects. Recoveries for the majority of PFASs observed were between 79.1% and 108% for these matrix spike samples. Perfluorooctadecanoate (PFODA) and 6:2 FTCA had average matrix spike recoveries of 10 and 42% respectively; thus, measurements of these analytes are considered semiquantitative.

Instrumental Drift. Quality control (QC) samples were used to monitor instrumental drift. If the concentration of a reported PFAS in the QC sample was not within  $\pm 30\%$  of the known concentration, samples analyzed after the failed QC up until the next passing QC were reanalyzed.

Sample Variability. To assess variability within samples, triplicates of three composite samples were analyzed and reported. Relative standard deviations ranged from 13-47% (average 31%).

SRM Spike Recovery. In preliminary experiments, extraction efficiencies for particulate PFASs within total water samples were determined by adding a standard reference material (SRM 2585 Organic Contaminants in House Dust and SRM 2781 Domestic Sludge) to a known amount of Optima LC/MS grade water. The standard reference materials had been previously analyzed and contained known amounts of PFOS. These suspended sediments underwent identical processing. Extraction efficiencies (mean  $\pm$  standard deviation) from triplicate samples were  $13.8\% \pm 0.9\%$  and  $64.8\% \pm 0.95\%$ , respectively, for household dust and domestic sludge. PFOS extraction efficiency from stormwater sediment likely falls between these two numbers. While these extraction efficiencies are lower than typically desired, they reflect the limitations of attempting to extract primarily aqueous samples with low levels of suspended solids.

#### Text S5.4. PFASs – Eurofins

Based on QA review of the spiked recovery samples and lab duplicates (discussed in detail below), semi-quantitative analytes include 6:2 diPAP, 8:2 diPAP, and perfluorododecanoate (PFDoDA). Analytes with insufficiently quantitative measurements include 6:2/8:2 diPAP, 11-chloroeicosafluoro-3-oxaundecane-1-sulfonic acid (F53B minor), N-ethyl-perfluorooctanesulfonamidoethanol (NEtFOSE), N-methyl-perfluorooctanesulfonamide (NMeFOSA), and perfluorodecanesulfonate (PFDS).

Analytical QC. Each analytical batch of up to 20 samples included a negative control (Method Blank, MB) and a minimum of a positive control (Laboratory Control Sample, LCS). A duplicate LCS may be included. Data were integrated with the LIMS (Laboratory Informatics Management System) and then reviewed by both a primary and secondary analyst.

Blanks and Spikes. Overall, only minor laboratory and field blank contamination was reported for a handful of analytes, and recoveries were mostly within target ranges for the most common analytes. For laboratory replicates, precision was within the laboratory's target RPD of 30% for about half of the 20 quantifiable analytes. Variation in field replicates was over 50% RPD for 13 quantifiable analytes. Of those, most were analytes that were measured in one field replicate at over six-fold the MDL but not detected in the other replicate. Analytes with RPDs of 65-120% are considered semi-quantitative, and include bis(1H,1H,2H,2H-perfluorodecyl)phosphate (6:2 diPAP), bis(1H,1H,2H,2H-perfluorooctyl)phosphate (8:2 diPAP), and perfluorododecanoate (PFODA). Analytes with quality assurance measures outside the semi-quantitative range had RPDs above 120%: 6:2/8:2 fluorotelomer phosphate diester (6:2/8:2 diPAP), 11-chloroeicosafluoro-3-oxaundecane-1-sulfonic acid (F53B-minor), N-ethyl-



perfluorooctanesulfonamidoethanol (NEtFOSE), N-methyl-perfluorooctanesulfonamide (NMeFOSA), and perfluorodecanesulfonate (PFDS).

Average laboratory blanks were generally below MDL, aside from 10:2 fluorotelomer phosphate diester (10:2 diPAP), bis(1H,1H,2H,2H-perfluorodecyl) phosphate (6:2 diPAP), and bis(1H,1H,2H,2H-perfluorooctyl) phosphate (8:2 diPAP). Field samples in those batches were flagged (VIP), with results less than 3x the blank also flagged as concentrations not distinguishable from blanks (VIPND), representing 94% and 75% of the results for 10:2 diPAP and 6:2 diPAP, respectively. In the field blank, perfluorooctanesulfonate (PFOS) and perfluorodecanesulfonate (PFDS) were detected. The field blanks that differed by less than a day from the field samples on the same site were used to flag site field samples.

## Text S6. Quantitative Concentration Data

All quantitative results of LC-MS/MS analyses are summarized in a series of Excel tables, listed below.

**Table S20.** Full summary of averaged concentration data, including replicate numbers, variability, and QA/QC information. Sample ID is provided as SiteType\_SiteID\_Year, where NF = near field, OB = open bay, US = urban stormwater, and Ref = reference. UnitName defines the concentration unit for Result, MDL, and MQL. LabCalcType and FieldCalcType indicate the calculation used to evaluate variability across lab and field replicates, respectively, with the corresponding values in LabCalcValue and FieldCalcValue, respectively. QA codes are consistent with those used by the California Environmental Data Exchange Network (CEDEN): [http://ceden.org/CEDEN\\_Checker/Checker/DisplayCEDENLookUp.php?List=QALookUp](http://ceden.org/CEDEN_Checker/Checker/DisplayCEDENLookUp.php?List=QALookUp), with the addition of two codes: DIL (Sample diluted 10x and re-analyzed, quantitation possible within calibration range) and CJ.DIL (Sample diluted 10x and re-analyzed, analyte still above calibration range, result considered semi-quantitative) (Excel).

**Table S21.** Summary of averaged data for SWCECs. Units are ng/L in the original water sample. Note that additional details (e.g., % RPD or % RSD, number of replicates, etc.) are provided in Table S20 (Excel).

**Table S22.** Summaries of averaged data for bisphenols and OPEs that had detections >MDL (top) and of total concentration for bisphenols, total OPEs, and individual OPE classes (bottom). Units are ng/L in the original water sample. \*Semi-quantitative analytes. Note that additional details (e.g., % RPD or % RSD, number of replicates, etc.) are provided in Table S20 (Excel).

**Table S23.** Summary of averaged data for PFASs (including only PFCAs, PFSAAs, and diPAP analytes). Units are ng/L in the original water sample. Note that additional details (e.g., % RPD or % RSD, number of replicates, etc.) are provided in Table S20 (Excel).

## **Text S7. Statistical Analyses**

Results of non-parametric Spearman rank correlations (statistical significance level was set to  $\alpha = 0.05$ ) are summarized in the below Excel table.

**Table S24.** Pairwise, non-parametric Spearman rank correlations among individual contaminants. Statistical significance level set to  $\alpha = 0.05$ . Correlations were only evaluated for analytes detected in  $\geq 50\%$  of all available samples. Coloration is yellow  $>0.50 - 0.70$ , green  $>0.70-1.0$  (Excel).

# SI Figures

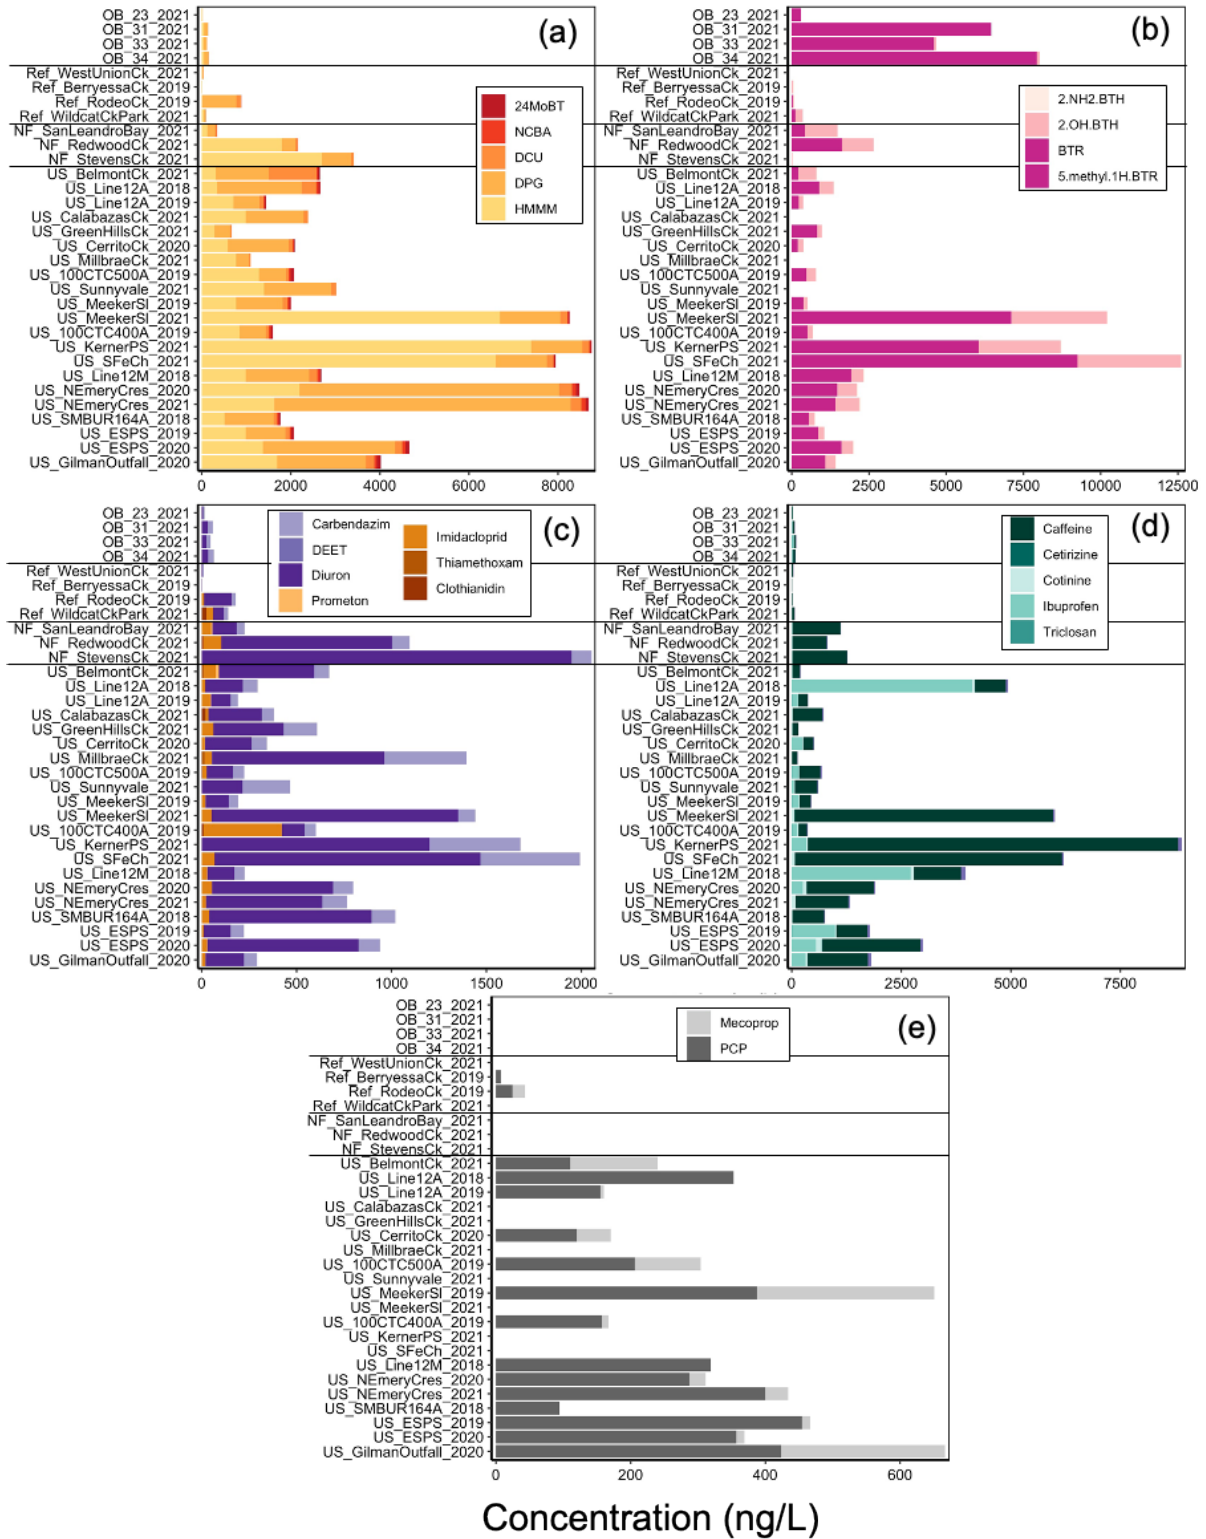

**Figure S1.** Bar chart summarizing all SWCEC concentrations in urban stormwater samples, grouped by compound class: (a) vehicle-derived chemicals (not including 6PPDQ), (b) BTH/BTRs, (c, e) pesticides, and (d) PPCPs. Pesticides are represented in two panels to separate

(c) compounds analyzed in all samples vs. (e) in only 2 of the reference sites and 14 of the urban stormwater samples. Non-detects (i.e., concentrations <MDL) are not plotted (i.e., represented as a concentration of zero) (see **Table S8** for MDL values). Sample names indicate SiteType\_SiteName\_Year, where OB = open Bay sites, NF = near field sites, Ref = reference sites, and US = urban stormwater sites. Site types are also separated by a horizontal black line. Site order from top to bottom is based on 1) the percent of impervious landcover in the watershed that corresponds to each sampling site (see **Table S2**), and 2) chronological order for repeat sampling at a given site (see **Table S3**).

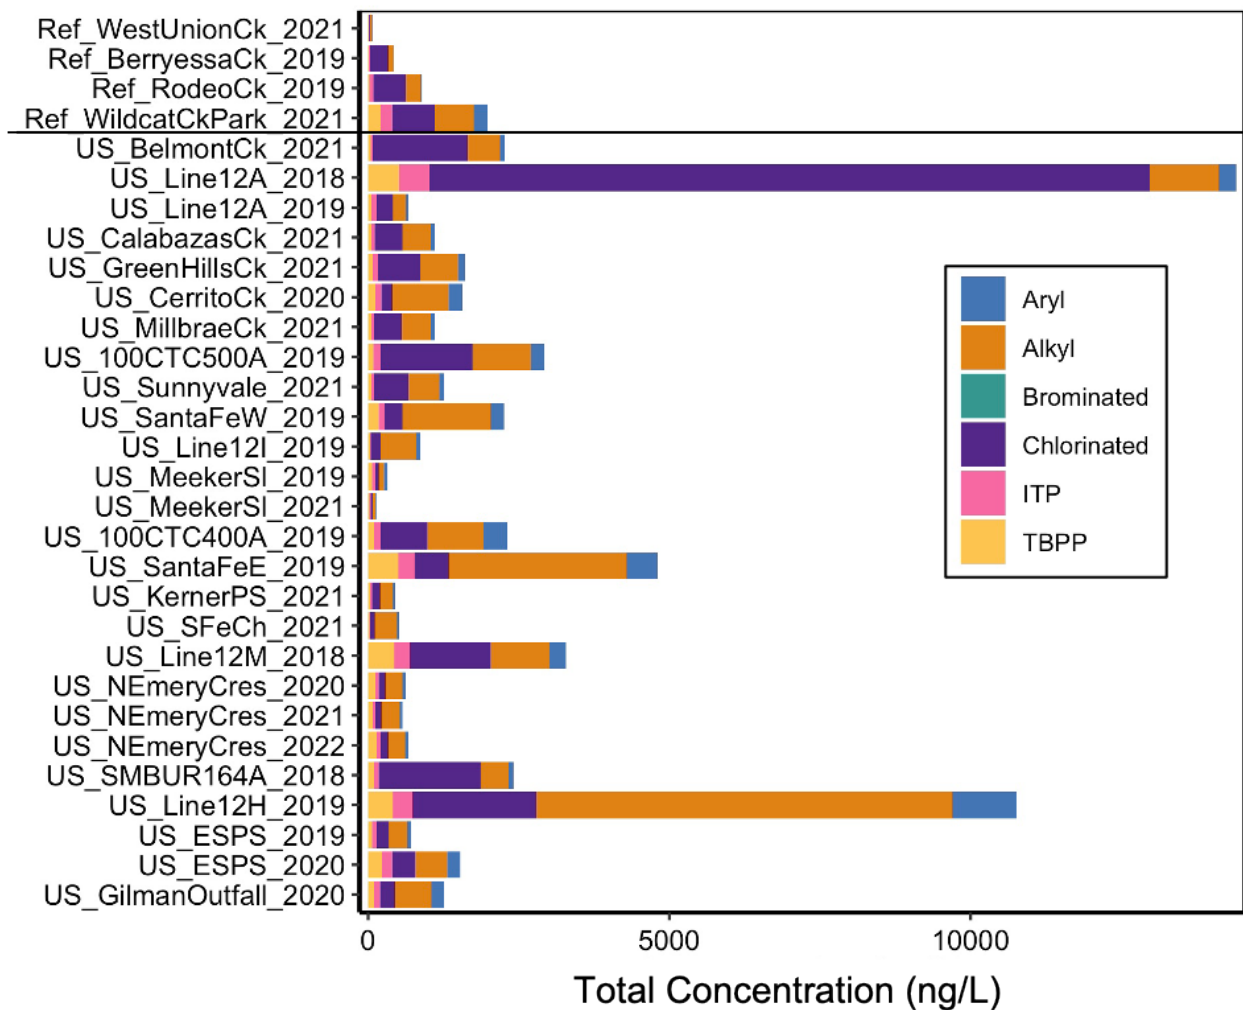

**Figure S2.** Bar chart summarizing all organophosphate ester (OPE) concentrations in urban stormwater samples, by OPE class. Non-detects (i.e., concentrations <MDL) are not plotted (i.e., represented as a concentration of zero) (see **Table S16** for MDL values). Sample names indicate SiteType\_SiteName\_Year, where Ref = reference sites and US = urban stormwater sites. Site types are also separated by a horizontal black line. Site order from top to bottom is based on 1) the percent of impervious landcover in the watershed that corresponds to each sampling site (see **Table S2**), and 2) chronological order for repeat sampling at a given site (see **Table S3**).

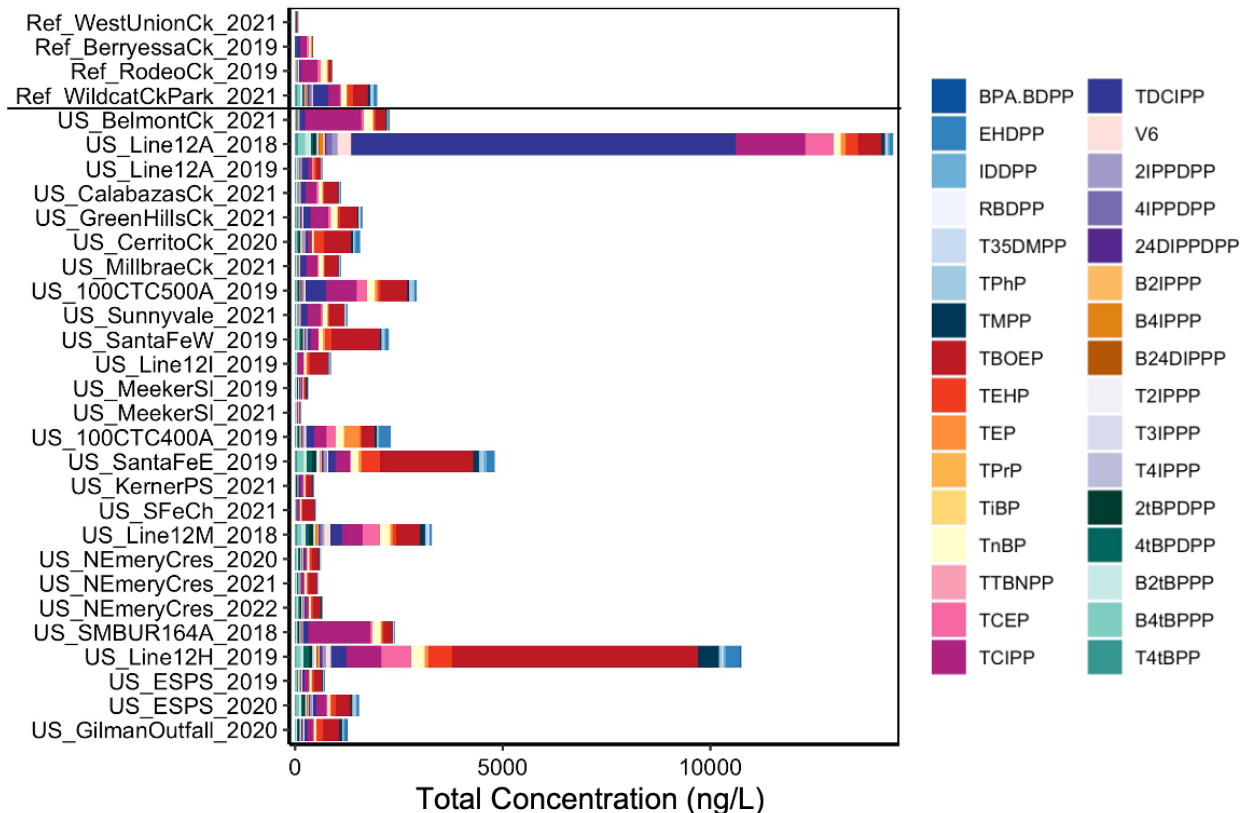

**Figure S3.** Bar chart summarizing all organophosphate ester (OPE) concentrations in urban stormwater samples, by individual analyte. Non-detects (i.e., concentrations <MDL) are not plotted (i.e., represented as a concentration of zero) (see **Table S16** for MDL values). Sample names indicate SiteType\_SiteName\_Year, where Ref = reference sites and US = urban stormwater sites. Site types are also separated by a horizontal black line. Site order from top to bottom is based on 1) the percent of impervious landcover in the watershed that corresponds to each sampling site (see **Table S2**), and 2) chronological order for repeat sampling at a given site (see **Table S3**).

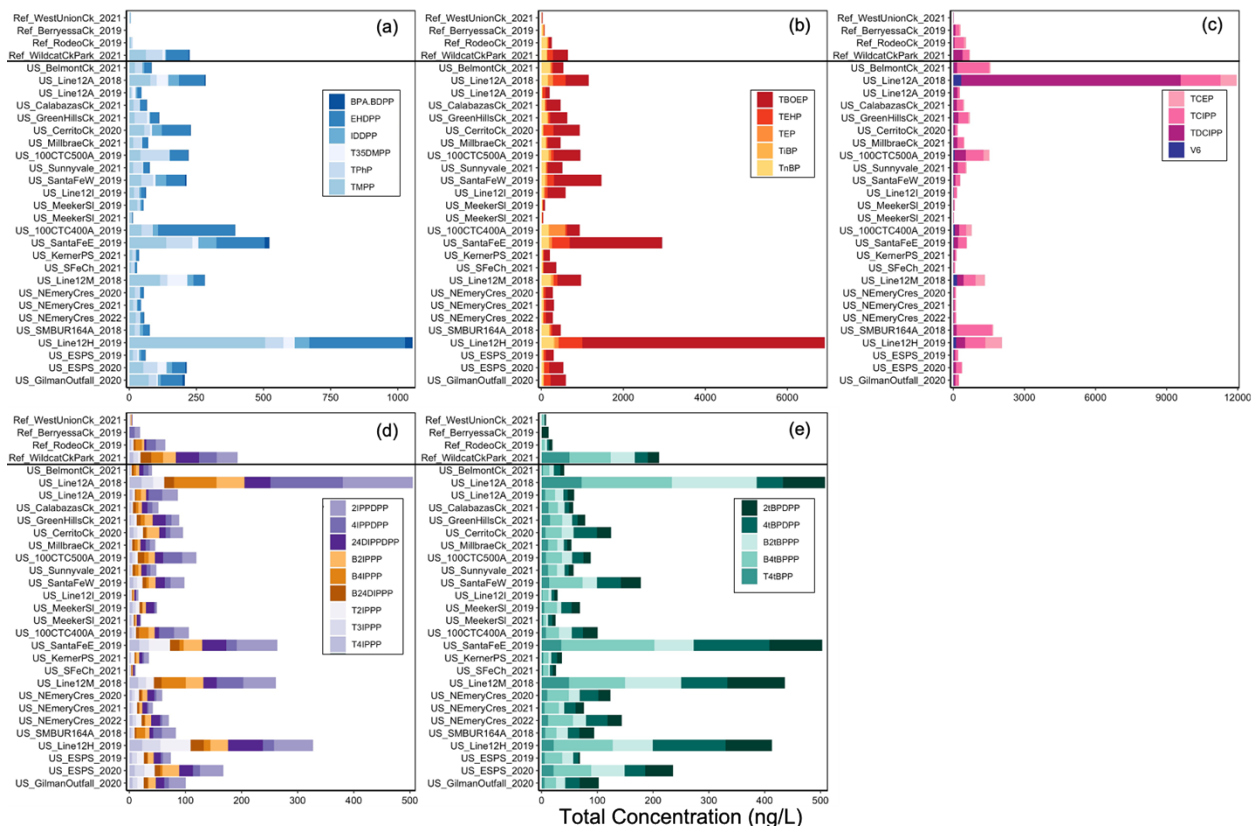

**Figure S4.** Bar chart summarizing organophosphate ester (OPE) concentrations in urban stormwater samples, with each panel representing an OPE class: (a) Aryl OPEs, (b) Alkyl OPEs, (c) Chlorinated OPEs, (d) ITPs, and (e) TBPPs. Non-detects (i.e., concentrations <MDL) are not plotted (i.e., represented as a concentration of zero) (see **Table S16** for MDL values). Sample names indicate SiteType\_SiteName\_Year, where Ref = reference sites and US = urban stormwater sites. Site types are also separated by a horizontal black line. Site order from top to bottom is based on 1) the percent of impervious landcover in the watershed that corresponds to each sampling site (see **Table S2**), and 2) chronological order for repeat sampling at a given site (see **Table S3**).



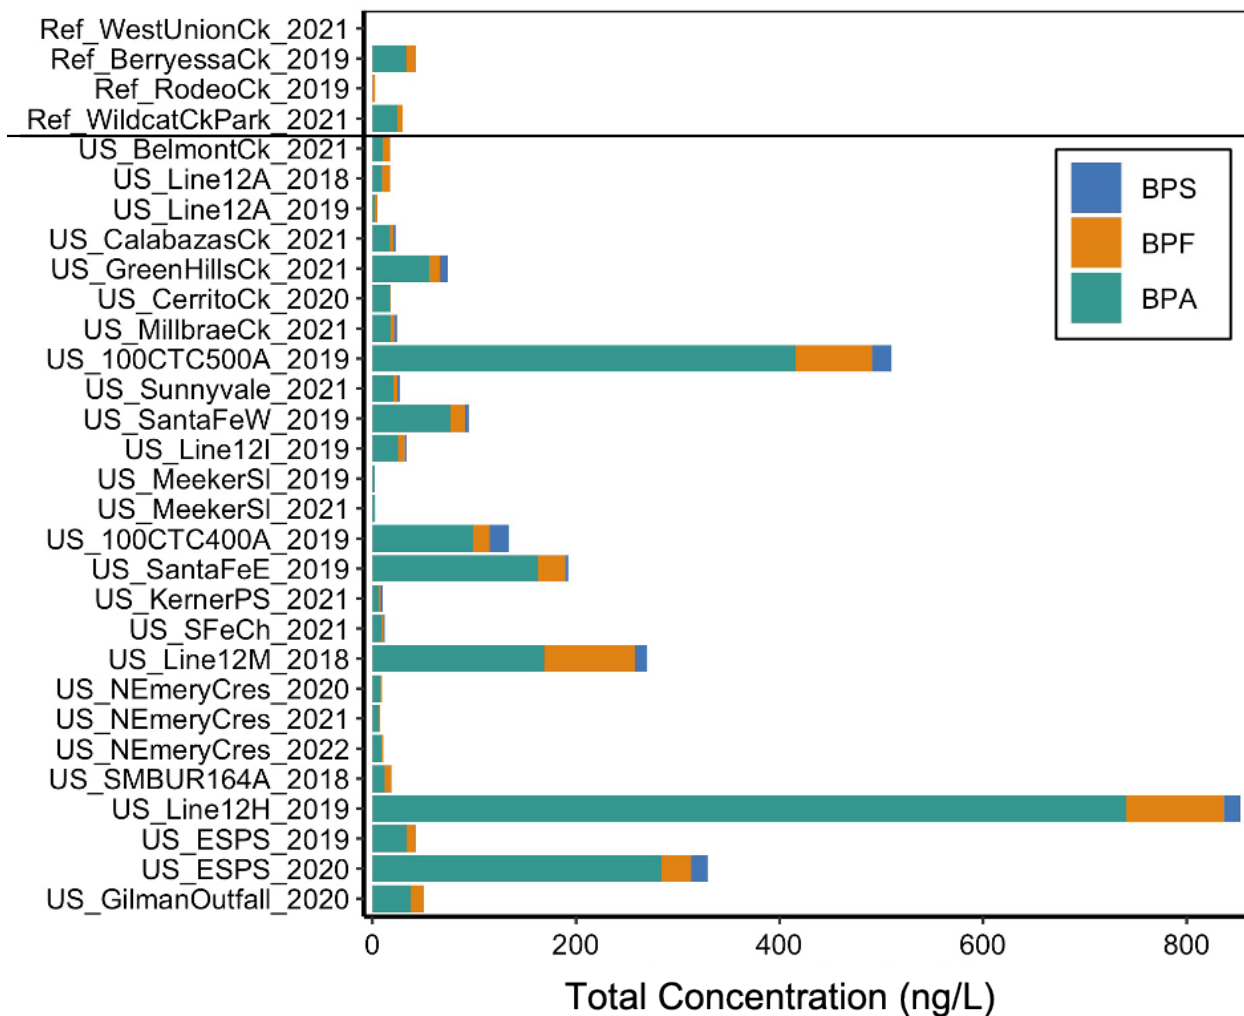

**Figure S5.** Bar chart summarizing bisphenol concentrations with detection frequency (DF) >15% in urban stormwater samples. Non-detects (i.e., concentrations <MDL) are not plotted (i.e., represented as a concentration of zero) (see **Table S16** for MDL values). Sample names indicate SiteType\_SiteName\_Year, where Ref = reference sites and US = urban stormwater sites. Site types are separated by a horizontal black line. Site order from top to bottom is based on 1) the percent of impervious landcover in the watershed that corresponds to each sampling site (see **Table S2**), and 2) chronological order for repeat sampling at a given site (see **Table S3**).

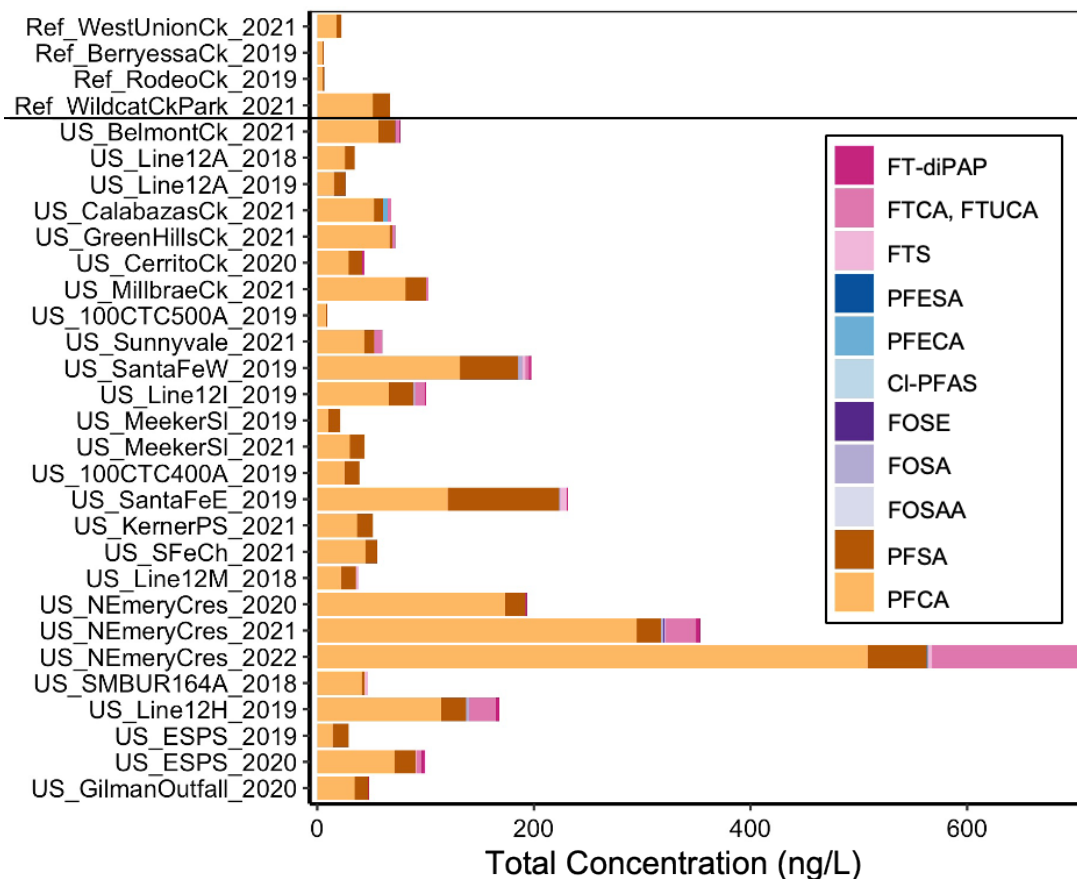

**Figure S6.** Bar chart summarizing all PFAS concentrations in urban stormwater samples, by PFAS class. Non-detects (i.e., concentrations <MDL) are not plotted (i.e., represented as a concentration of zero) (see **Table S18** for MDL values). Sample names indicate SiteType\_SiteName\_Year, where Ref = reference sites and US = urban stormwater sites. Site types are separated by a horizontal black line. Site order from top to bottom is based on 1) the percent of impervious landcover in the watershed that corresponds to each sampling site (see **Table S2**), and 2) chronological order for repeat sampling at a given site (see **Table S3**).

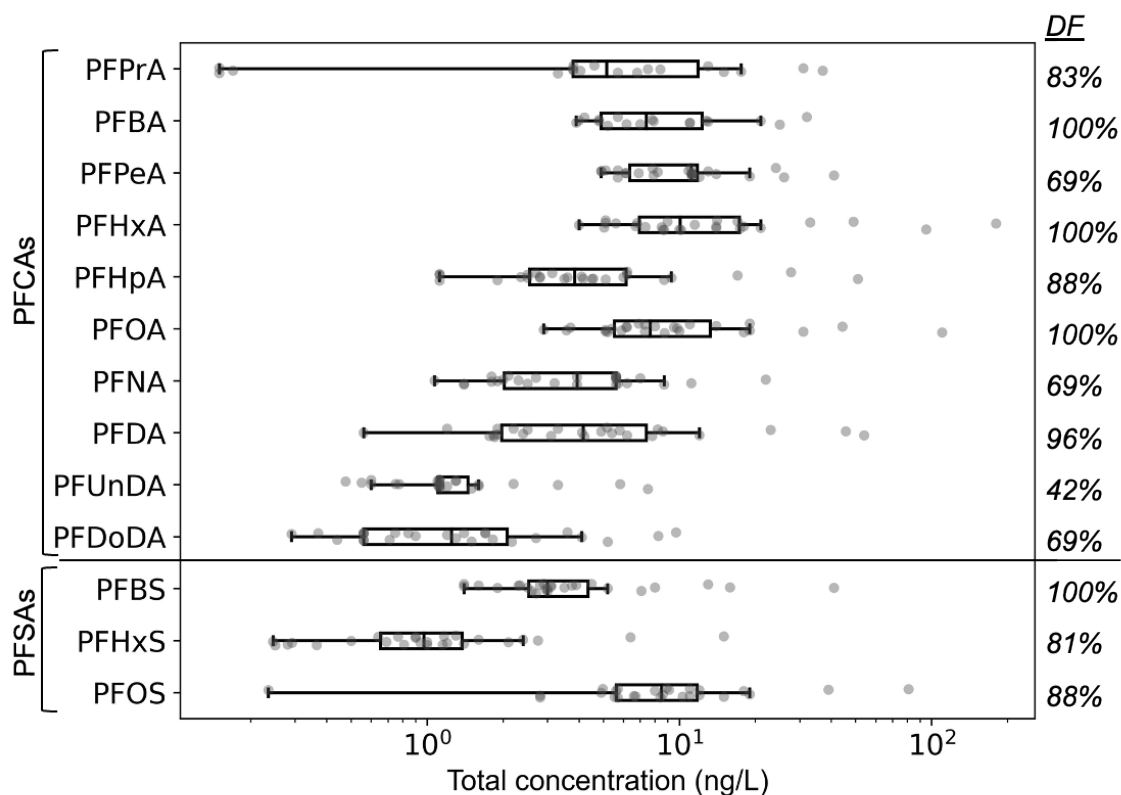

**Figure S7.** Box-and-whisker plot summarizing perfluorocarboxylic acid (PFCA) and perfluorosulfonic acid (PFSA) concentrations in urban stormwater samples, for analytes with detection frequency (DF) > 15%. Concentrations for PFDoDA are semi-quantitative. Detection frequencies are based on 26 urban stormwater samples, except for PFPrA and PFBA (n=18). Boxes indicate 25<sup>th</sup> – 75<sup>th</sup> percentile, whiskers indicate 10<sup>th</sup>-90<sup>th</sup> percentile, and a point is plotted for every sampling event, with all non-detects (i.e., concentrations <MDL) shown on the plot as ½\*MDL (see **Table S18** for MDL values).

## References

- (1) Hou, F.; Tian, Z.; Peter, K. T.; Wu, C.; Gipe, A. D.; Zhao, H.; Alegria, E. A.; Liu, F.; Kolodziej, E. P. Quantification of Organic Contaminants in Urban Stormwater by Isotope Dilution and Liquid Chromatography-Tandem Mass Spectrometry. *Analytical and Bioanalytical Chemistry* **2019**, *411* (29), 7791–7806. <https://doi.org/10.1007/s00216-019-02177-3>.
- (2) Tian, Z.; Gonzalez, M.; Rideout, C. A.; Zhao, H. N.; Hu, X.; Wetzel, J.; Mudrock, E.; James, C. A.; McIntyre, J. K.; Kolodziej, E. P. 6PPD-Quinone: Revised Toxicity Assessment and Quantification with a Commercial Standard. *Environ. Sci. Technol. Lett.* **2022**, *9* (2), 140–146. <https://doi.org/10.1021/acs.estlett.1c00910>.
- (3) Shimabuku, I.; Chen, D.; Wu, Y.; Miller, E.; Sun, J.; Sutton, R. Occurrence and Risk Assessment of Organophosphate Esters and Bisphenols in San Francisco Bay, California, USA. *Science of The Total Environment* **2022**, *813*, 152287. <https://doi.org/10.1016/j.scitotenv.2021.152287>.
- (4) Murray, C. C.; Vatankhah, H.; McDonough, C. A.; Nickerson, A.; Hedtke, T. T.; Cath, T. Y.; Higgins, C. P.; Bellona, C. L. Removal of Per- and Polyfluoroalkyl Substances Using Super-Fine Powder Activated Carbon and Ceramic Membrane Filtration. *Journal of Hazardous Materials* **2019**, *366*, 160–168. <https://doi.org/10.1016/j.jhazmat.2018.11.050>.
